# Supplementary material for: ARID1A deficiency promotes progression and potentiates therapeutic antitumour immunity in hepatitis B virus-related hepatocellular carcinoma
Source: Springer Nature journal article supplement (doi:10.1186/s12876-023-03059-w), 2024-01-02
Supplement: MOESM1 [file 26582710]

**Supplementary File S1. Clinical information of 425 patients with HBV infection**

| <b>Patient</b> | <b>ARID1A</b> | <b>Age</b> |
|----------------|---------------|------------|
| H050226        | Normal        | 41-60      |
| H050267        | Normal        | 41-60      |
| H050313        | Normal        | 41-60      |
| H050329        | Normal        | 41-60      |
| H050350        | Normal        | 41-60      |
| H050401        | Normal        | 41-60      |
| H050420        | Normal        | 41-60      |
| H050452        | Normal        | 61-80      |
| H050510        | Normal        | 61-80      |
| H050566        | Normal        | 20-40      |
| H050572        | Normal        | 41-60      |
| H050604        | Normal        | 41-60      |
| H060030        | Normal        | 41-60      |
| H060098        | Deficiency    | 41-60      |
| H060115        | Normal        | 41-60      |
| H060236        | Normal        | 41-60      |
| H060264        | Normal        | 61-80      |
| H060362        | Normal        | 41-60      |
| H060509        | Normal        | 61-80      |
| H060555        | Normal        | 61-80      |
| H060607        | Normal        | 61-80      |
| H060616        | Normal        | 41-60      |
| H060617        | Normal        | 41-60      |
| H060664        | Normal        | 41-60      |
| H060670        | Deficiency    | 41-60      |
| H060674        | Normal        | 41-60      |
| H060690        | Normal        | 41-60      |
| H060795        | Normal        | 41-60      |
| H060859        | Normal        | 41-60      |
| H061039        | Normal        | 41-60      |
| H061142        | Normal        | 41-60      |
| H061840        | Normal        | 41-60      |
| H062024        | Normal        | 20-40      |
| H070487        | Normal        | 41-60      |
| H070599        | Normal        | 41-60      |
| H071380        | Normal        | 41-60      |
| H071591        | Normal        | 41-60      |
| H071859        | Normal        | 20-40      |
| H071899        | Normal        | 41-60      |
| H071904        | Normal        | 41-60      |
| H071941        | Normal        | 41-60      |
| H072012        | Normal        | 61-80      |
| H072032        | Normal        | 20-40      |
| H072059        | Normal        | 41-60      |
| H072103        | Normal        | 41-60      |
| H072441        | Normal        | 20-40      |
| H072447        | Normal        | 41-60      |
| H072511        | Normal        | 61-80      |
| H072525        | Normal        | 20-40      |
| H072543        | Normal        | 41-60      |
| H072601        | Normal        | 41-60      |
| H072623        | Normal        | 41-60      |
| H072749        | Normal        | 61-80      |
| H072777        | Normal        | 41-60      |
| H072813        | Normal        | 41-60      |
| H072820        | Normal        | 41-60      |
| H072849        | Normal        | 41-60      |
| H072896        | Deficiency    | 41-60      |
| H072926        | Normal        | 41-60      |
| H072932        | Normal        | 41-60      |
| H072961        | Normal        | 20-40      |
| H072992        | Normal        | 41-60      |

|         |            |       |
|---------|------------|-------|
| H072999 | Normal     | 41-60 |
| H080015 | Normal     | 41-60 |
| H080025 | Normal     | 41-60 |
| H080037 | Normal     | 61-80 |
| H080061 | Normal     | 41-60 |
| H080074 | Normal     | 41-60 |
| H080174 | Normal     | 41-60 |
| H080196 | Normal     | 41-60 |
| H080204 | Normal     | 41-60 |
| H080217 | Normal     | 41-60 |
| H080486 | Normal     | 41-60 |
| H080503 | Normal     | 20-40 |
| H080530 | Normal     | 41-60 |
| H080540 | Normal     | 41-60 |
| H080750 | Normal     | 41-60 |
| H080774 | Normal     | 41-60 |
| H080782 | Normal     | 41-60 |
| H080854 | Normal     | 41-60 |
| H080895 | Deficiency | 41-60 |
| H080931 | Normal     | 61-80 |
| H080971 | Normal     | 41-60 |
| H081003 | Normal     | 61-80 |
| H081048 | Normal     | 61-80 |
| H081559 | Normal     | 41-60 |
| H090285 | Normal     | 41-60 |
| H090528 | Normal     | 41-60 |
| H090798 | Normal     | 61-80 |
| H090866 | Normal     | 41-60 |
| H090901 | Normal     | 61-80 |
| H091225 | Normal     | 41-60 |
| H091269 | Normal     | 61-80 |
| H091309 | Normal     | 61-80 |
| H091449 | Normal     | 41-60 |
| H091469 | Normal     | 41-60 |
| H091547 | Normal     | 41-60 |
| H091652 | Normal     | 41-60 |
| H091665 | Normal     | 61-80 |
| H091689 | Normal     | 41-60 |
| H091730 | Normal     | 41-60 |
| H091794 | Normal     | 41-60 |
| H091831 | Normal     | 41-60 |
| H091867 | Normal     | 61-80 |
| H091869 | Normal     | 61-80 |
| H091908 | Normal     | 41-60 |
| H091920 | Normal     | 41-60 |
| H091972 | Normal     | 41-60 |
| H092093 | Normal     | 41-60 |
| H092293 | Normal     | 41-60 |
| H092452 | Normal     | 41-60 |
| H092610 | Normal     | 41-60 |
| H092773 | Normal     | 41-60 |
| H092789 | Normal     | 41-60 |
| H092933 | Normal     | 41-60 |
| H093001 | Normal     | 20-40 |
| H093002 | Normal     | 41-60 |
| H093030 | Normal     | 20-40 |
| H093032 | Normal     | 61-80 |
| H093134 | Normal     | 41-60 |
| H093428 | Normal     | 41-60 |
| H093471 | Normal     | 41-60 |
| H093528 | Normal     | 61-80 |
| H093609 | Normal     | 41-60 |
| H093624 | Normal     | 61-80 |
| H093650 | Normal     | 41-60 |

|         |            |       |
|---------|------------|-------|
| H093770 | Normal     | 61-80 |
| H093843 | Normal     | 41-60 |
| H093867 | Normal     | 41-60 |
| H093904 | Normal     | 61-80 |
| H104025 | Normal     | 41-60 |
| H104044 | Normal     | 41-60 |
| H104351 | Normal     | 20-40 |
| H104362 | Normal     | 41-60 |
| H104490 | Deficiency | 61-80 |
| H104529 | Normal     | 61-80 |
| H104572 | Normal     | 41-60 |
| H104656 | Normal     | 41-60 |
| H104773 | Normal     | 41-60 |
| H105140 | Normal     | 41-60 |
| H110058 | Normal     | 41-60 |
| H110061 | Normal     | 61-80 |
| H110104 | Normal     | 41-60 |
| H110134 | Normal     | 41-60 |
| H110146 | Normal     | 41-60 |
| H110261 | Normal     | 41-60 |
| H110362 | Normal     | 41-60 |
| H110379 | Normal     | 61-80 |
| H110451 | Normal     | 41-60 |
| H110467 | Normal     | 61-80 |
| H110669 | Normal     | 20-40 |
| H110702 | Normal     | 41-60 |
| H110772 | Normal     | 41-60 |
| H110773 | Normal     | 61-80 |
| H110795 | Normal     | 41-60 |
| H110908 | Normal     | 41-60 |
| H111183 | Normal     | 61-80 |
| H111362 | Normal     | 41-60 |
| H111720 | Normal     | 41-60 |
| H111889 | Normal     | 41-60 |
| H112288 | Normal     | 61-80 |
| H112290 | Normal     | 61-80 |
| H112345 | Normal     | 41-60 |
| H112352 | Normal     | 61-80 |
| H112562 | Normal     | 61-80 |
| H112665 | Normal     | 41-60 |
| H112971 | Normal     | 41-60 |
| T1013   | Normal     | 20-40 |
| T1015   | Normal     | 41-60 |
| T1021   | Normal     | 41-60 |
| T1025   | Normal     | 61-80 |
| T1027   | Normal     | 20-40 |
| T1031   | Normal     | 41-60 |
| T1041   | Normal     | 41-60 |
| T1043   | Normal     | 41-60 |
| T1045   | Normal     | 61-80 |
| T112    | Normal     | 61-80 |
| T113    | Deficiency | 41-60 |
| T127    | Normal     | 61-80 |
| T141    | Normal     | >80   |
| T187    | Deficiency | 41-60 |
| T191    | Deficiency | 41-60 |
| T195    | Normal     | 20-40 |
| T211    | Normal     | 41-60 |
| T217    | Normal     | 61-80 |
| T221    | Normal     | 41-60 |
| T223    | Normal     | 61-80 |
| T227    | Normal     | 61-80 |
| T231    | Normal     | 41-60 |
| T257    | Normal     | 41-60 |

|      |            |       |
|------|------------|-------|
| T261 | Normal     | 61-80 |
| T267 | Normal     | 61-80 |
| T271 | Normal     | 20-40 |
| T277 | Normal     | 61-80 |
| T283 | Normal     | 61-80 |
| T285 | Normal     | 61-80 |
| T311 | Normal     | 41-60 |
| T313 | Normal     | 41-60 |
| T327 | Normal     | 41-60 |
| T331 | Normal     | 41-60 |
| T341 | Normal     | 61-80 |
| T343 | Normal     | 41-60 |
| T351 | Normal     | 20-40 |
| T353 | Normal     | 41-60 |
| T355 | Normal     | 20-40 |
| T357 | Normal     | 41-60 |
| T361 | Normal     | 41-60 |
| T363 | Normal     | 41-60 |
| T365 | Normal     | 61-80 |
| T367 | Normal     | 41-60 |
| T375 | Normal     | 41-60 |
| T383 | Normal     | 61-80 |
| T385 | Deficiency | 61-80 |
| T387 | Normal     | 41-60 |
| T391 | Normal     | 61-80 |
| T393 | Deficiency | 41-60 |
| T395 | Normal     | 20-40 |
| T411 | Normal     | 20-40 |
| T413 | Deficiency | 41-60 |
| T415 | Normal     | 61-80 |
| T421 | Normal     | 41-60 |
| T423 | Normal     | 41-60 |
| T425 | Normal     | 61-80 |
| T427 | Normal     | 41-60 |
| T431 | Normal     | 41-60 |
| T433 | Normal     | 41-60 |
| T435 | Normal     | 41-60 |
| T443 | Normal     | 41-60 |
| T445 | Normal     | 41-60 |
| T451 | Deficiency | 61-80 |
| T455 | Normal     | 41-60 |
| T461 | Normal     | 61-80 |
| T463 | Normal     | 41-60 |
| T465 | Normal     | 61-80 |
| T467 | Normal     | 41-60 |
| T471 | Normal     | 41-60 |
| T473 | Normal     | 41-60 |
| T477 | Normal     | 61-80 |
| T481 | Normal     | 41-60 |
| T483 | Normal     | 41-60 |
| T487 | Normal     | 41-60 |
| T491 | Normal     | 41-60 |
| T493 | Normal     | 61-80 |
| T497 | Normal     | 20-40 |
| T513 | Normal     | 41-60 |
| T515 | Normal     | 41-60 |
| T517 | Normal     | 41-60 |
| T523 | Normal     | 61-80 |
| T525 | Normal     | 20-40 |
| T527 | Normal     | 41-60 |
| T533 | Normal     | 20-40 |
| T537 | Normal     | 61-80 |
| T545 | Normal     | 41-60 |
| T553 | Normal     | 20-40 |

|                 |            |       |
|-----------------|------------|-------|
| T557            | Normal     | 41-60 |
| T563            | Normal     | 61-80 |
| T567            | Normal     | 41-60 |
| T571            | Normal     | 20-40 |
| T573            | Deficiency | 41-60 |
| T615            | Normal     | 61-80 |
| T617            | Normal     | 41-60 |
| T627            | Normal     | 41-60 |
| T635            | Normal     | 61-80 |
| T641            | Normal     | 41-60 |
| T647            | Normal     | 20-40 |
| T661            | Normal     | 41-60 |
| T663            | Normal     | 41-60 |
| T665            | Deficiency | 41-60 |
| T671            | Normal     | 41-60 |
| T685            | Normal     | 41-60 |
| T695            | Normal     | 61-80 |
| T713            | Normal     | 41-60 |
| T715            | Deficiency | 41-60 |
| T721            | Normal     | 61-80 |
| T724            | Normal     | >80   |
| T727            | Normal     | 61-80 |
| T737            | Normal     | 41-60 |
| T741            | Normal     | 41-60 |
| T743            | Normal     | 20-40 |
| T745            | Normal     | 41-60 |
| T755            | Deficiency | 61-80 |
| T777            | Normal     | 20-40 |
| T785            | Normal     | 41-60 |
| T813            | Normal     | 41-60 |
| T815            | Normal     | 41-60 |
| T817            | Normal     | 41-60 |
| T823            | Normal     | 41-60 |
| T851            | Deficiency | 61-80 |
| T857            | Normal     | 61-80 |
| T861            | Normal     | 61-80 |
| T863            | Normal     | 61-80 |
| T865            | Normal     | 41-60 |
| T867            | Normal     | 61-80 |
| T873            | Deficiency | 41-60 |
| T877            | Normal     | 20-40 |
| T881            | Normal     | 41-60 |
| T883            | Normal     | 41-60 |
| T911            | Normal     | 61-80 |
| T913            | Normal     | 41-60 |
| T915            | Normal     | 41-60 |
| T917            | Normal     | 61-80 |
| T921            | Normal     | 41-60 |
| T923            | Deficiency | 41-60 |
| T925            | Normal     | 61-80 |
| T937            | Normal     | 41-60 |
| T943            | Normal     | 41-60 |
| T951            | Normal     | 41-60 |
| T953            | Normal     | 61-80 |
| T955            | Normal     | 41-60 |
| T957            | Normal     | 41-60 |
| T963            | Normal     | 41-60 |
| T965            | Normal     | 61-80 |
| T967            | Normal     | 41-60 |
| T975            | Deficiency | 20-40 |
| T977            | Normal     | 41-60 |
| T981            | Normal     | 61-80 |
| T983            | Normal     | 20-40 |
| TCGA-BC-A10W-01 | Deficiency | 41-60 |

|                 |            |       |
|-----------------|------------|-------|
| TCGA-BW-A5NP-01 | Normal     | 20-40 |
| TCGA-CC-5258-01 | Deficiency | 41-60 |
| TCGA-CC-5259-01 | Normal     | 41-60 |
| TCGA-CC-5262-01 | Deficiency | 61-80 |
| TCGA-CC-5263-01 | Normal     | 20-40 |
| TCGA-CC-5264-01 | Normal     | 61-80 |
| TCGA-CC-A1HT-01 | Normal     | 41-60 |
| TCGA-CC-A3M9-01 | Normal     | 41-60 |
| TCGA-CC-A3MB-01 | Normal     | 20-40 |
| TCGA-CC-A3MC-01 | Normal     | 41-60 |
| TCGA-CC-A5UC-01 | Normal     | 61-80 |
| TCGA-CC-A5UD-01 | Normal     | 41-60 |
| TCGA-CC-A5UE-01 | Normal     | 41-60 |
| TCGA-CC-A7IG-01 | Normal     | 41-60 |
| TCGA-CC-A7II-01 | Normal     | 41-60 |
| TCGA-CC-A7IK-01 | Normal     | 41-60 |
| TCGA-CC-A7IL-01 | Normal     | 61-80 |
| TCGA-CC-A9FU-01 | Normal     | 41-60 |
| TCGA-DD-A116-01 | Normal     | 61-80 |
| TCGA-DD-A119-01 | Normal     | 20-40 |
| TCGA-DD-A11A-01 | Normal     | 61-80 |
| TCGA-DD-A1EH-01 | Deficiency | 20-40 |
| TCGA-DD-A1EI-01 | Normal     | 41-60 |
| TCGA-DD-A1EL-01 | Normal     | 20-40 |
| TCGA-DD-A3A3-01 | Normal     | 41-60 |
| TCGA-DD-A4NK-01 | Normal     | 61-80 |
| TCGA-DD-A4NQ-01 | Normal     | 41-60 |
| TCGA-DD-AAC8-01 | Normal     | 61-80 |
| TCGA-DD-AAC9-01 | Normal     | 41-60 |
| TCGA-DD-AACA-01 | Normal     | 61-80 |
| TCGA-DD-AACB-01 | Normal     | 61-80 |
| TCGA-DD-AACC-01 | Normal     | 61-80 |
| TCGA-DD-AACD-01 | Normal     | 41-60 |
| TCGA-DD-AACE-01 | Normal     | 61-80 |
| TCGA-DD-AACG-01 | Deficiency | 41-60 |
| TCGA-DD-AACH-01 | Normal     | 61-80 |
| TCGA-DD-AACK-01 | Deficiency | 61-80 |
| TCGA-DD-AACM-01 | Normal     | 41-60 |
| TCGA-DD-AACN-01 | Normal     | 20-40 |
| TCGA-DD-AACO-01 | Normal     | 20-40 |
| TCGA-DD-AACQ-01 | Normal     | 41-60 |
| TCGA-DD-AACS-01 | Normal     | 20-40 |
| TCGA-DD-AACT-01 | Normal     | 61-80 |
| TCGA-DD-AACU-01 | Normal     | 41-60 |
| TCGA-DD-AACY-01 | Normal     | 61-80 |
| TCGA-DD-AAD0-01 | Normal     | 61-80 |
| TCGA-DD-AAD2-01 | Normal     | 61-80 |
| TCGA-DD-AAD6-01 | Normal     | 61-80 |
| TCGA-DD-AADA-01 | Normal     | 61-80 |
| TCGA-DD-AADB-01 | Normal     | 41-60 |
| TCGA-DD-AADC-01 | Normal     | 41-60 |
| TCGA-DD-AADD-01 | Normal     | 41-60 |
| TCGA-DD-AADE-01 | Normal     | 41-60 |
| TCGA-DD-AADF-01 | Normal     | 61-80 |
| TCGA-DD-AADI-01 | Normal     | 41-60 |
| TCGA-DD-AADK-01 | Normal     | 61-80 |
| TCGA-DD-AADP-01 | Deficiency | 41-60 |
| TCGA-DD-AADW-01 | Normal     | 41-60 |
| TCGA-DD-AADY-01 | Normal     | 41-60 |
| TCGA-DD-AAE0-01 | Normal     | 41-60 |
| TCGA-DD-AAE1-01 | Normal     | 41-60 |
| TCGA-DD-AAE2-01 | Normal     | 41-60 |
| TCGA-DD-AAE4-01 | Normal     | 41-60 |
| TCGA-DD-AAE8-01 | Normal     | 41-60 |

|                 |            |       |
|-----------------|------------|-------|
| TCGA-DD-AAEE-01 | Normal     | 41-60 |
| TCGA-DD-AAEI-01 | Normal     | 61-80 |
| TCGA-DD-AAEK-01 | Normal     | 41-60 |
| TCGA-DD-AAVP-01 | Normal     | 41-60 |
| TCGA-DD-AAVQ-01 | Normal     | 20-40 |
| TCGA-DD-AAVR-01 | Normal     | 41-60 |
| TCGA-DD-AAVS-01 | Normal     | 41-60 |
| TCGA-DD-AAVU-01 | Normal     | 41-60 |
| TCGA-DD-AAVV-01 | Normal     | 41-60 |
| TCGA-DD-AAVW-01 | Normal     | 20-40 |
| TCGA-DD-AAVX-01 | Deficiency | 20-40 |
| TCGA-DD-AAVZ-01 | Normal     | 20-40 |
| TCGA-DD-AAW0-01 | Normal     | 41-60 |
| TCGA-ED-A459-01 | Normal     | 41-60 |
| TCGA-ED-A4XI-01 | Normal     | 41-60 |
| TCGA-ED-A5KG-01 | Normal     | 41-60 |
| TCGA-ED-A66Y-01 | Normal     | 41-60 |
| TCGA-ED-A7PX-01 | Normal     | 41-60 |
| TCGA-ED-A7PY-01 | Normal     | 20-40 |
| TCGA-ED-A7PZ-01 | Normal     | 61-80 |
| TCGA-ED-A7XO-01 | Normal     | 20-40 |
| TCGA-ED-A7XP-01 | Normal     | 41-60 |
| TCGA-G3-A25U-01 | Normal     | 61-80 |
| TCGA-G3-A25Y-01 | Normal     | 41-60 |
| TCGA-G3-A25Z-01 | Normal     | 41-60 |
| TCGA-G3-A3CH-01 | Normal     | 41-60 |
| TCGA-G3-A3CK-01 | Normal     | 61-80 |
| TCGA-G3-AAV0-01 | Normal     | 41-60 |
| TCGA-G3-AAV1-01 | Normal     | 41-60 |
| TCGA-G3-AAV4-01 | Normal     | >80   |
| TCGA-G3-AAV6-01 | Normal     | 41-60 |
| TCGA-G3-AAV7-01 | Normal     | 20-40 |
| TCGA-K7-A6G5-01 | Normal     | 61-80 |
| TCGA-O8-A75V-01 | Normal     | 41-60 |
| TCGA-QA-A7B7-01 | Normal     | 41-60 |
| TCGA-RC-A7S9-01 | Normal     | 41-60 |
| TCGA-RC-A7SB-01 | Normal     | 41-60 |
| TCGA-RC-A7SH-01 | Normal     | 41-60 |
| TCGA-UB-A7MC-01 | Normal     | 41-60 |
| TCGA-UB-A7ME-01 | Normal     | 41-60 |
| TCGA-UB-A7MF-01 | Normal     | 41-60 |
| TCGA-XR-A8TF-01 | Deficiency | 61-80 |
| TCGA-ZP-A9CZ-01 | Normal     | 61-80 |





|     |    |     |
|-----|----|-----|
| III | NA | AMC |
| III | NA | AMC |
| III | NA | AMC |
| II  | NA | AMC |
| II  | NA | AMC |
| III | NA | AMC |
| III | NA | AMC |
| II  | NA | AMC |
| III | NA | AMC |
| III | NA | AMC |
| II  | NA | AMC |
| II  | NA | AMC |
| III | NA | AMC |
| IV  | NA | AMC |
| III | NA | AMC |
| III | NA | AMC |
| III | NA | AMC |
| II  | NA | AMC |
| II  | NA | AMC |
| II  | NA | AMC |
| III | NA | AMC |
| II  | NA | AMC |
| II  | NA | AMC |
| III | NA | AMC |
| III | NA | AMC |
| III | NA | AMC |
| III | NA | AMC |
| II  | NA | AMC |
| II  | NA | AMC |
| III | NA | AMC |
| III | NA | AMC |
| III | NA | AMC |
| III | NA | AMC |
| III | NA | AMC |
| II  | NA | AMC |
| III | NA | AMC |
| II  | NA | AMC |
| II  | NA | AMC |
| IV  | NA | AMC |
| III | NA | AMC |
| II  | NA | AMC |
| IV  | NA | AMC |
| IV  | NA | AMC |
| III | NA | AMC |

|     |        |      |
|-----|--------|------|
| II  | NA     | AMC  |
| III | NA     | AMC  |
| III | NA     | AMC  |
| II  | NA     | AMC  |
| II  | NA     | AMC  |
| IV  | NA     | AMC  |
| III | NA     | AMC  |
| III | NA     | AMC  |
| II  | NA     | AMC  |
| III | NA     | AMC  |
| IV  | NA     | AMC  |
| III | NA     | AMC  |
| III | NA     | AMC  |
| II  | NA     | AMC  |
| III | NA     | AMC  |
| III | NA     | AMC  |
| II  | NA     | AMC  |
| III | NA     | AMC  |
| III | NA     | AMC  |
| IV  | NA     | AMC  |
| III | NA     | AMC  |
| III | NA     | AMC  |
| II  | NA     | AMC  |
| III | NA     | AMC  |
| III | NA     | AMC  |
| II  | NA     | AMC  |
| III | NA     | AMC  |
| III | NA     | AMC  |
| IV  | NA     | AMC  |
| III | NA     | AMC  |
| II  | NA     | AMC  |
| III | NA     | AMC  |
| III | NA     | AMC  |
| II  | NA     | AMC  |
| III | NA     | AMC  |
| III | NA     | AMC  |
| II  | NA     | AMC  |
| IV  | NA     | AMC  |
| III | NA     | AMC  |
| II  | NA     | AMC  |
| III | NA     | AMC  |
| III | NA     | AMC  |
| II  | NA     | AMC  |
| I   | Male   | CHCC |
| I   | Male   | CHCC |
| I   | Female | CHCC |
| I   | Female | CHCC |
| III | Female | CHCC |
| I   | Male   | CHCC |
| III | Male   | CHCC |
| I   | Female | CHCC |
| II  | Male   | CHCC |
| I   | Male   | CHCC |
| III | Male   | CHCC |
| I   | Male   | CHCC |
| I   | Male   | CHCC |
| I   | Male   | CHCC |
| I   | Male   | CHCC |
| I   | Male   | CHCC |
| I   | Female | CHCC |
| I   | Male   | CHCC |
| I   | Male   | CHCC |
| II  | Male   | CHCC |
| I   | Male   | CHCC |
| I   | Male   | CHCC |

|     |        |      |
|-----|--------|------|
| III | Male   | CHCC |
| II  | Male   | CHCC |
| II  | Male   | CHCC |
| I   | Male   | CHCC |
| I   | Male   | CHCC |
| IV  | Male   | CHCC |
| II  | Male   | CHCC |
| III | Male   | CHCC |
| III | Male   | CHCC |
| III | Male   | CHCC |
| I   | Female | CHCC |
| III | Female | CHCC |
| III | Male   | CHCC |
| I   | Male   | CHCC |
| III | Male   | CHCC |
| I   | Male   | CHCC |
| I   | Male   | CHCC |
| I   | Male   | CHCC |
| IV  | Male   | CHCC |
| III | Male   | CHCC |
| III | Male   | CHCC |
| III | Male   | CHCC |
| I   | Female | CHCC |
| I   | Male   | CHCC |
| I   | Male   | CHCC |
| III | Male   | CHCC |
| I   | Male   | CHCC |
| I   | Male   | CHCC |
| III | Male   | CHCC |
| II  | Male   | CHCC |
| I   | Male   | CHCC |
| I   | Male   | CHCC |
| I   | Female | CHCC |
| II  | Male   | CHCC |
| III | Male   | CHCC |
| I   | Female | CHCC |
| I   | Male   | CHCC |
| III | Male   | CHCC |
| I   | Male   | CHCC |
| I   | Male   | CHCC |
| I   | Female | CHCC |
| I   | Male   | CHCC |
| I   | Male   | CHCC |
| III | Female | CHCC |
| III | Male   | CHCC |
| I   | Male   | CHCC |
| III | Male   | CHCC |
| I   | Male   | CHCC |
| I   | Male   | CHCC |
| I   | Male   | CHCC |
| III | Male   | CHCC |
| III | Male   | CHCC |
| III | Male   | CHCC |
| I   | Male   | CHCC |
| III | Male   | CHCC |
| I   | Male   | CHCC |
| I   | Female | CHCC |

|     |        |      |
|-----|--------|------|
| III | Male   | CHCC |
| I   | Male   | CHCC |
| III | Male   | CHCC |
| I   | Male   | CHCC |
| I   | Male   | CHCC |
| I   | Female | CHCC |
| I   | Male   | CHCC |
| I   | Male   | CHCC |
| I   | Male   | CHCC |
| III | Female | CHCC |
| I   | Male   | CHCC |
| III | Male   | CHCC |
| III | Male   | CHCC |
| I   | Male   | CHCC |
| I   | Male   | CHCC |
| I   | Male   | CHCC |
| III | Male   | CHCC |
| I   | Female | CHCC |
| III | Male   | CHCC |
| I   | Female | CHCC |
| I   | Female | CHCC |
| III | Female | CHCC |
| I   | Female | CHCC |
| II  | Male   | CHCC |
| III | Female | CHCC |
| II  | Female | CHCC |
| I   | Male   | CHCC |
| I   | Female | CHCC |
| I   | Male   | CHCC |
| III | Male   | CHCC |
| I   | Female | CHCC |
| I   | Male   | CHCC |
| III | Male   | CHCC |
| I   | Female | CHCC |
| I   | Female | CHCC |
| I   | Male   | CHCC |
| I   | Male   | CHCC |
| I   | Male   | CHCC |
| I   | Male   | CHCC |
| I   | Male   | CHCC |
| III | Male   | CHCC |
| I   | Male   | CHCC |
| I   | Male   | CHCC |
| III | Male   | CHCC |
| III | Male   | CHCC |
| III | Male   | CHCC |
| I   | Male   | CHCC |
| III | Male   | CHCC |
| III | Male   | CHCC |
| III | Male   | CHCC |
| III | Male   | CHCC |
| I   | Female | CHCC |
| I   | Male   | CHCC |
| III | Male   | CHCC |
| III | Male   | CHCC |
| I   | Female | CHCC |
| I   | Male   | CHCC |
| II  | Female | CHCC |
| III | Male   | CHCC |
| III | Male   | CHCC |
| I   | Female | CHCC |
| I   | Female | CHCC |
| III | Male   | CHCC |
| III | Male   | CHCC |
| III | Male   | CHCC |
| III | Male   | CHCC |
| NA  | Male   | TCGA |

|     |        |      |
|-----|--------|------|
| IV  | Female | TCGA |
| II  | Male   | TCGA |
| III | Female | TCGA |
| III | Male   | TCGA |
| III | Male   | TCGA |
| III | Male   | TCGA |
| III | Male   | TCGA |
| III | Male   | TCGA |
| III | Male   | TCGA |
| III | Male   | TCGA |
| III | Male   | TCGA |
| III | Male   | TCGA |
| III | Male   | TCGA |
| III | Male   | TCGA |
| III | Male   | TCGA |
| III | Female | TCGA |
| III | Male   | TCGA |
| IV  | Male   | TCGA |
| I   | Male   | TCGA |
| III | Male   | TCGA |
| I   | Male   | TCGA |
| II  | Male   | TCGA |
| I   | Male   | TCGA |
| III | Female | TCGA |
| II  | Male   | TCGA |
| I   | Male   | TCGA |
| I   | Male   | TCGA |
| I   | Male   | TCGA |
| I   | Female | TCGA |
| I   | Male   | TCGA |
| I   | Male   | TCGA |
| I   | Male   | TCGA |
| II  | Male   | TCGA |
| II  | Male   | TCGA |
| I   | Male   | TCGA |
| II  | Male   | TCGA |
| I   | Male   | TCGA |
| I   | Male   | TCGA |
| I   | Male   | TCGA |
| I   | Female | TCGA |
| I   | Male   | TCGA |
| I   | Male   | TCGA |
| I   | Female | TCGA |
| I   | Male   | TCGA |
| III | Male   | TCGA |
| I   | Female | TCGA |
| I   | Male   | TCGA |
| I   | Male   | TCGA |
| I   | Male   | TCGA |
| I   | Male   | TCGA |
| I   | Female | TCGA |
| I   | Female | TCGA |
| II  | Female | TCGA |
| I   | Male   | TCGA |
| I   | Male   | TCGA |
| I   | Female | TCGA |
| III | Female | TCGA |
| I   | Male   | TCGA |
| I   | Male   | TCGA |
| I   | Female | TCGA |
| I   | Male   | TCGA |

|     |        |      |
|-----|--------|------|
| I   | Male   | TCGA |
| I   | Male   | TCGA |
| II  | Male   | TCGA |
| I   | Male   | TCGA |
| I   | Male   | TCGA |
| I   | Male   | TCGA |
| I   | Male   | TCGA |
| II  | Male   | TCGA |
| II  | Male   | TCGA |
| I   | Male   | TCGA |
| II  | Male   | TCGA |
| I   | Male   | TCGA |
| I   | Male   | TCGA |
| II  | Male   | TCGA |
| II  | Male   | TCGA |
| II  | Female | TCGA |
| III | Female | TCGA |
| II  | Female | TCGA |
| II  | Female | TCGA |
| II  | Male   | TCGA |
| III | Male   | TCGA |
| II  | Female | TCGA |
| I   | Female | TCGA |
| I   | Female | TCGA |
| I   | Male   | TCGA |
| III | Male   | TCGA |
| I   | Male   | TCGA |
| I   | Male   | TCGA |
| III | Male   | TCGA |
| I   | Female | TCGA |
| III | Female | TCGA |
| II  | Male   | TCGA |
| I   | Male   | TCGA |
| I   | Male   | TCGA |
| II  | Male   | TCGA |
| I   | Female | TCGA |
| II  | Male   | TCGA |
| II  | Male   | TCGA |
| III | Male   | TCGA |
| I   | Male   | TCGA |
| III | Male   | TCGA |
| I   | Male   | TCGA |
| NA  | Male   | TCGA |
