# Supplementary material for: ARID1A deficiency promotes progression and potentiates therapeutic antitumour immunity in hepatitis B virus-related hepatocellular carcinoma
Source: Springer Nature journal article supplement (doi:10.1186/s12876-023-03059-w), 2024-01-02
Supplement: MOESM2 [file 26582710]

## Supplementary File S2. ssGSEA score of immune signatures

### ID

T112  
T113  
T127  
T141  
T187  
T191  
T195  
T211  
T217  
T221  
T223  
T227  
T231  
T257  
T261  
T267  
T271  
T277  
T283  
T285  
T311  
T313  
T327  
T331  
T341  
T343  
T351  
T353  
T355  
T357  
T361  
T363  
T365  
T367  
T375  
T383  
T385  
T387  
T391  
T393  
T395  
T411  
T413  
T415  
T421  
T423  
T425  
T427  
T431  
T433  
T435  
T443

T445  
T451  
T455  
T461  
T463  
T465  
T467  
T471  
T473  
T477  
T481  
T483  
T487  
T491  
T493  
T497  
T513  
T515  
T517  
T523  
T525  
T527  
T533  
T537  
T545  
T553  
T557  
T563  
T567  
T571  
T573  
T615  
T617  
T627  
T635  
T641  
T647  
T661  
T663  
T665  
T671  
T685  
T695  
T713  
T715  
T721  
T724  
T727  
T737  
T741  
T743  
T745  
T755  
T777

T785  
T813  
T815  
T817  
T823  
T851  
T857  
T861  
T863  
T865  
T867  
T873  
T877  
T881  
T883  
T911  
T913  
T915  
T917  
T921  
T923  
T925  
T937  
T943  
T951  
T953  
T955  
T957  
T963  
T965  
T967  
T975  
T977  
T981  
T983  
T1013  
T1015  
T1021  
T1025  
T1027  
T1031  
T1041  
T1043  
T1045

aDC

|             | all Immune | B          |
|-------------|------------|------------|
| 0.332933771 | 0.56546765 | 0.39104621 |
| 0.589334096 | 0.71086738 | 0.43390667 |
| 0.337228129 | 0.6145476  | 0.45864836 |
| 0.400491022 | 0.73501396 | 0.46830115 |
| 0.368848393 | 0.73009115 | 0.5274511  |
| 0.415569278 | 0.74697821 | 0.55132946 |
| 0.410947778 | 0.72651244 | 0.53127348 |
| 0.558208627 | 0.87185564 | 0.60899204 |
| 0.553823635 | 0.81497119 | 0.57576365 |
| 0.396000824 | 0.66772396 | 0.46018835 |
| 0.436365382 | 0.7747629  | 0.57052757 |
| 0.3195842   | 0.66205514 | 0.45908054 |
| 0.352919006 | 0.646624   | 0.41246147 |
| 0.323987886 | 0.57644307 | 0.38016646 |
| 0.413042305 | 0.6921198  | 0.43901172 |
| 0.343433062 | 0.60460248 | 0.37611289 |
| 0.261646875 | 0.60127791 | 0.39564564 |
| 0.384239522 | 0.63402362 | 0.47444315 |
| 0.457279852 | 0.70267161 | 0.37889954 |
| 0.367393121 | 0.68429214 | 0.46250064 |
| 0.426277314 | 0.82406183 | 0.53015992 |
| 0.322817755 | 0.57894515 | 0.36566238 |
| 0.44630505  | 0.67711989 | 0.45478724 |
| 0.274400766 | 0.56246337 | 0.40682405 |
| 0.384902185 | 0.63140603 | 0.48551951 |
| 0.574429855 | 0.65004847 | 0.4668582  |
| 0.3630818   | 0.5497472  | 0.36823152 |
| 0.388544855 | 0.67902936 | 0.46724424 |
| 0.364328675 | 0.58606647 | 0.41925726 |
| 0.332193466 | 0.53344013 | 0.39773078 |
| 0.287886821 | 0.6578945  | 0.40758228 |
| 0.293907509 | 0.70472485 | 0.45799116 |
| 0.376173915 | 0.73256205 | 0.48910772 |
| 0.389068095 | 0.680314   | 0.46265435 |
| 0.412018556 | 0.68203975 | 0.47661719 |
| 0.41080197  | 0.77521293 | 0.54388916 |
| 0.398982977 | 0.74469757 | 0.52017394 |
| 0.370480519 | 0.68098325 | 0.48686736 |
| 0.394933536 | 0.70905457 | 0.42934987 |
| 0.358395431 | 0.5674999  | 0.38904906 |
| 0.388494414 | 0.68502823 | 0.49426568 |
| 0.368800748 | 0.56194335 | 0.39152425 |
| 0.381047943 | 0.66090174 | 0.44945745 |
| 0.493444107 | 0.77141862 | 0.54266128 |
| 0.403428272 | 0.68072204 | 0.4831629  |
| 0.459790062 | 0.66620536 | 0.49764528 |
| 0.255912001 | 0.57825198 | 0.43062775 |
| 0.350799386 | 0.63867287 | 0.44430434 |
| 0.358445563 | 0.61204081 | 0.42844751 |
| 0.335007373 | 0.65439235 | 0.4846221  |
| 0.227416287 | 0.53172041 | 0.34403226 |
| 0.340295688 | 0.65002527 | 0.429106   |

|             |             |             |
|-------------|-------------|-------------|
| 0.383848585 | 0.56282324  | 0.37483593  |
| 0.50850382  | 0.78060778  | 0.52057695  |
| 0.420740624 | 0.73054314  | 0.51345609  |
| 0.410741296 | 0.69665809  | 0.4951732   |
| 0.259351079 | 0.60706289  | 0.45898251  |
| 0.32226794  | 0.57873394  | 0.37585509  |
| 0.524386456 | 0.73323981  | 0.49975878  |
| 0.491727128 | 0.75018632  | 0.51528965  |
| 0.231934065 | 0.53478355  | 0.33850097  |
| 0.301448391 | 0.58898955  | 0.3559103   |
| 0.283569155 | 0.68504995  | 0.4794718   |
| 0.367103769 | 0.66968177  | 0.47274014  |
| 0.381625727 | 0.65326186  | 0.42184943  |
| 0.347562395 | 0.71989996  | 0.45168806  |
| 0.42285193  | 0.68856652  | 0.52709     |
| 0.374168671 | 0.60371271  | 0.43663531  |
| 0.322874597 | 0.62754314  | 0.3996156   |
| 0.300881936 | 0.61705626  | 0.39719544  |
| 0.327493275 | 0.60303295  | 0.36557469  |
| 0.27258459  | 0.52192565  | 0.36982703  |
| 0.3878807   | 0.70582554  | 0.46912807  |
| 0.442282    | 0.63104202  | 0.41612037  |
| 0.343826438 | 0.60150999  | 0.39220659  |
| 0.350903387 | 0.63483974  | 0.43559478  |
| 0.299343405 | 0.64345997  | 0.46644133  |
| 0.42891875  | 0.70738198  | 0.43918088  |
| 0.528534712 | 0.70913633  | 0.43624705  |
| 0.399838867 | 0.75803299  | 0.54399925  |
| 0.383270855 | 0.63784143  | 0.36608579  |
| 0.342425705 | 0.63548322  | 0.44274457  |
| 0.449032603 | 0.76095297  | 0.51713355  |
| 0.264898456 | 0.57820586  | 0.39437973  |
| 0.313968313 | 0.68456858  | 0.51851292  |
| 0.414428181 | 0.64619209  | 0.40279743  |
| 0.309535491 | 0.5906283   | 0.42567065  |
| 0.271887687 | 0.68696051  | 0.48078034  |
| 0.315066222 | 0.57754358  | 0.36521452  |
| 0.473705388 | 0.74796514  | 0.56680409  |
| 0.277622347 | 0.62881039  | 0.39927361  |
| 0.369429687 | 0.6272864   | 0.37626636  |
| 0.336572712 | 0.55481441  | 0.44158124  |
| 0.446137163 | 0.68502541  | 0.4698802   |
| 0.250402378 | 0.57509157  | 0.36530051  |
| 0.361276732 | 0.72270783  | 0.48915275  |
| 0.31766885  | 0.672756408 | 0.345534343 |
| 0.50796879  | 0.80025437  | 0.58042457  |
| 0.460645193 | 0.81709446  | 0.61389837  |
| 0.539879649 | 0.64227828  | 0.46155607  |
| 0.358187943 | 0.59809153  | 0.43307782  |
| 0.322038662 | 0.58719951  | 0.40832287  |
| 0.13022423  | 0.44612407  | 0.3312553   |
| 0.335460675 | 0.60672774  | 0.41331873  |
| 0.398440963 | 0.6556619   | 0.49483903  |
| 0.241375148 | 0.55323092  | 0.42475002  |

|             |            |            |
|-------------|------------|------------|
| 0.272741947 | 0.62336993 | 0.45618174 |
| 0.191722563 | 0.58390959 | 0.43117844 |
| 0.385155843 | 0.62392259 | 0.528251   |
| 0.401941132 | 0.66447411 | 0.47747658 |
| 0.367868366 | 0.73058917 | 0.54705318 |
| 0.462783524 | 0.71578437 | 0.44634472 |
| 0.340500116 | 0.71806654 | 0.51615996 |
| 0.436674693 | 0.76760706 | 0.48506409 |
| 0.323454064 | 0.64746928 | 0.47772471 |
| 0.378295315 | 0.58896154 | 0.44015605 |
| 0.353643826 | 0.7271425  | 0.50818427 |
| 0.298502535 | 0.59554478 | 0.43587503 |
| 0.24593842  | 0.56601551 | 0.40577099 |
| 0.302490105 | 0.66010418 | 0.48095794 |
| 0.395302252 | 0.65407862 | 0.4774668  |
| 0.142481665 | 0.55683005 | 0.35321321 |
| 0.270208976 | 0.6574964  | 0.43184209 |
| 0.377265556 | 0.68155174 | 0.45770248 |
| 0.265656011 | 0.63298412 | 0.43430727 |
| 0.308411573 | 0.56778269 | 0.41920639 |
| 0.369818894 | 0.7045259  | 0.45478845 |
| 0.326678534 | 0.67540464 | 0.48189404 |
| 0.361930061 | 0.67740284 | 0.45925414 |
| 0.281824223 | 0.67483946 | 0.50546146 |
| 0.400719126 | 0.58065015 | 0.41566561 |
| 0.418608712 | 0.59752354 | 0.40913068 |
| 0.429339196 | 0.68833287 | 0.5038345  |
| 0.349908781 | 0.57406075 | 0.35439971 |
| 0.325718771 | 0.68021717 | 0.49981589 |
| 0.178175673 | 0.51812617 | 0.34947674 |
| 0.30873142  | 0.6219491  | 0.41673291 |
| 0.328438146 | 0.6068692  | 0.44247417 |
| 0.376095443 | 0.57222005 | 0.41221007 |
| 0.265471135 | 0.55965191 | 0.30260836 |
| 0.361457927 | 0.66193295 | 0.40550351 |
| 0.334996449 | 0.53653249 | 0.30196361 |
| 0.42581984  | 0.52362252 | 0.39793513 |
| 0.325845347 | 0.54974884 | 0.38647703 |
| 0.261954001 | 0.56357836 | 0.39023513 |
| 0.300285263 | 0.53141834 | 0.34714384 |
| 0.457423555 | 0.74830187 | 0.53773969 |
| 0.302208532 | 0.68904749 | 0.46896983 |
| 0.484759986 | 0.76494834 | 0.53819364 |
| 0.290298961 | 0.62476962 | 0.43809934 |

| CD8T       | Cytotoxic  | DC         | Eosinophils | iDC        | Macrophages | Mast       |
|------------|------------|------------|-------------|------------|-------------|------------|
| 0.70427598 | 0.5068665  | 0.41846236 | 0.54725685  | 0.50457919 | 0.52168333  | 0.3194326  |
| 0.73123388 | 0.66462778 | 0.53036533 | 0.52488574  | 0.53984281 | 0.57291333  | 0.32523286 |
| 0.70424512 | 0.49936635 | 0.44094454 | 0.51327414  | 0.53048052 | 0.58303668  | 0.16488269 |
| 0.69595295 | 0.59808863 | 0.652461   | 0.49288972  | 0.56439312 | 0.70662504  | 0.30228157 |
| 0.71797743 | 0.62451636 | 0.52755947 | 0.50298623  | 0.57800337 | 0.65225232  | 0.32778641 |
| 0.71518962 | 0.60509826 | 0.55506741 | 0.47986032  | 0.55762296 | 0.71625536  | 0.31404239 |
| 0.71722095 | 0.59183905 | 0.55894865 | 0.53752475  | 0.58056396 | 0.67536333  | 0.32293141 |
| 0.77276818 | 0.70015613 | 0.62226027 | 0.48337586  | 0.59251066 | 0.71227493  | 0.33467447 |
| 0.72455404 | 0.6605207  | 0.54891071 | 0.55166901  | 0.56967147 | 0.67255723  | 0.25303606 |
| 0.72709881 | 0.5258738  | 0.4111131  | 0.52787317  | 0.5657458  | 0.6345632   | 0.26434703 |
| 0.7376845  | 0.6560444  | 0.51145074 | 0.52875252  | 0.65833709 | 0.63965195  | 0.39219964 |
| 0.70086588 | 0.55656802 | 0.40984114 | 0.52570005  | 0.54862587 | 0.59868659  | 0.55476612 |
| 0.69040944 | 0.45929733 | 0.49300717 | 0.58417443  | 0.55958698 | 0.5880478   | 0.31341719 |
| 0.67548862 | 0.45512689 | 0.43482233 | 0.48195914  | 0.47518152 | 0.61957089  | 0.33418478 |
| 0.70597343 | 0.60599089 | 0.46075218 | 0.56016775  | 0.55930906 | 0.56415356  | 0.38663329 |
| 0.68843763 | 0.55002707 | 0.41501448 | 0.51456551  | 0.47341515 | 0.57983098  | 0.30329615 |
| 0.71541321 | 0.53498611 | 0.36284526 | 0.54256626  | 0.45522222 | 0.51751573  | 0.27500259 |
| 0.7027129  | 0.52254176 | 0.40708495 | 0.54055377  | 0.51579552 | 0.55171237  | 0.42235774 |
| 0.67222357 | 0.50150836 | 0.35299062 | 0.51835962  | 0.57516783 | 0.74597229  | 0.34932922 |
| 0.6893914  | 0.513058   | 0.42656286 | 0.49984852  | 0.58946642 | 0.65069299  | 0.28965608 |
| 0.73124495 | 0.60552336 | 0.6680485  | 0.54744568  | 0.65752836 | 0.78217425  | 0.50405721 |
| 0.66890297 | 0.45178298 | 0.46517104 | 0.48962223  | 0.48520968 | 0.61049841  | 0.31163193 |
| 0.70060349 | 0.57216774 | 0.54314962 | 0.55839762  | 0.58300755 | 0.58408109  | 0.36355304 |
| 0.71568293 | 0.44850675 | 0.3146977  | 0.54660223  | 0.52942646 | 0.57263596  | 0.25311017 |
| 0.70036449 | 0.53776598 | 0.51980955 | 0.55232394  | 0.57703671 | 0.57294585  | 0.26099906 |
| 0.7019591  | 0.49725622 | 0.53690621 | 0.54747227  | 0.52988175 | 0.66245483  | 0.30380709 |
| 0.69459164 | 0.39046207 | 0.34588736 | 0.49834848  | 0.49449101 | 0.57780649  | 0.2211868  |
| 0.72994815 | 0.62316146 | 0.52932293 | 0.54710468  | 0.56370008 | 0.58313324  | 0.34124385 |
| 0.68652211 | 0.41931413 | 0.47369073 | 0.5025829   | 0.49232649 | 0.56335806  | 0.32956604 |
| 0.67840298 | 0.47486026 | 0.41891118 | 0.56782565  | 0.45388618 | 0.53192314  | 0.29917608 |
| 0.70647635 | 0.51436579 | 0.45287738 | 0.53630761  | 0.5648332  | 0.61994487  | 0.34027317 |
| 0.72558675 | 0.58186777 | 0.44194571 | 0.53207503  | 0.59484447 | 0.69687353  | 0.49405673 |
| 0.69120922 | 0.58167423 | 0.58676303 | 0.51963304  | 0.60263173 | 0.68831435  | 0.31046284 |
| 0.7101755  | 0.54890259 | 0.42725855 | 0.51037108  | 0.55454957 | 0.62396577  | 0.42974394 |
| 0.65364084 | 0.48791385 | 0.41854171 | 0.49216634  | 0.48986615 | 0.63179941  | 0.33610909 |
| 0.75327171 | 0.72845098 | 0.5453421  | 0.50713532  | 0.56757911 | 0.66908794  | 0.32666713 |
| 0.76851428 | 0.65515993 | 0.48257034 | 0.50722249  | 0.5485567  | 0.65868936  | 0.29383802 |
| 0.67948397 | 0.54142808 | 0.40905016 | 0.50301731  | 0.5524312  | 0.61608244  | 0.29820301 |
| 0.69102766 | 0.49797081 | 0.51042631 | 0.51290241  | 0.58976165 | 0.64485236  | 0.28559519 |
| 0.69686366 | 0.51876247 | 0.4446532  | 0.54291     | 0.50235969 | 0.52700375  | 0.26299454 |
| 0.70682827 | 0.61609399 | 0.53748971 | 0.53177967  | 0.58943467 | 0.55720738  | 0.33195891 |
| 0.67914123 | 0.50371606 | 0.47991357 | 0.56051433  | 0.48820482 | 0.51480333  | 0.35541749 |
| 0.72072295 | 0.5395249  | 0.43947179 | 0.52144021  | 0.56191357 | 0.61388321  | 0.27124203 |
| 0.75483179 | 0.66557118 | 0.54612485 | 0.50831152  | 0.61473438 | 0.68963914  | 0.38099335 |
| 0.70899853 | 0.55642662 | 0.54154107 | 0.542672    | 0.57309833 | 0.70831166  | 0.40596991 |
| 0.70697044 | 0.64003722 | 0.474331   | 0.53110844  | 0.57618801 | 0.59530475  | 0.41702287 |
| 0.67976982 | 0.51763508 | 0.27755593 | 0.52179049  | 0.51628367 | 0.55527428  | 0.23760904 |
| 0.71330455 | 0.52793076 | 0.45331488 | 0.50342611  | 0.5345494  | 0.62818234  | 0.37972231 |
| 0.71568511 | 0.57488345 | 0.45817153 | 0.53558232  | 0.5199051  | 0.56528368  | 0.28686508 |
| 0.70210317 | 0.50158793 | 0.45659836 | 0.53429503  | 0.54740475 | 0.61743982  | 0.3381778  |
| 0.66692754 | 0.39706132 | 0.41253709 | 0.56367716  | 0.48244645 | 0.49577171  | 0.29775533 |
| 0.71980332 | 0.58344572 | 0.42138867 | 0.51440032  | 0.51523022 | 0.59283393  | 0.28490514 |

|             |             |             |             |             |             |             |
|-------------|-------------|-------------|-------------|-------------|-------------|-------------|
| 0.65499752  | 0.45055082  | 0.49395852  | 0.57045458  | 0.48956781  | 0.53832283  | 0.24592822  |
| 0.76862797  | 0.71347043  | 0.54465494  | 0.54727259  | 0.54382621  | 0.61697582  | 0.23262583  |
| 0.70747179  | 0.53094058  | 0.5356835   | 0.52296925  | 0.59439229  | 0.65019082  | 0.23498995  |
| 0.72591506  | 0.58239336  | 0.55536544  | 0.51401189  | 0.58571698  | 0.63644313  | 0.30283336  |
| 0.67071391  | 0.46740942  | 0.36072005  | 0.52597904  | 0.50019998  | 0.6052466   | 0.32975691  |
| 0.66855565  | 0.44750714  | 0.48268798  | 0.5320616   | 0.53456855  | 0.52419654  | 0.30772342  |
| 0.7349471   | 0.61100705  | 0.44959296  | 0.51160984  | 0.58046161  | 0.61893288  | 0.29002807  |
| 0.75284443  | 0.63858759  | 0.54022893  | 0.51149646  | 0.56740411  | 0.61283884  | 0.28610252  |
| 0.65016943  | 0.38806018  | 0.34262333  | 0.53581854  | 0.4371395   | 0.49477657  | 0.24992251  |
| 0.70255933  | 0.48064746  | 0.40979174  | 0.52596882  | 0.50153795  | 0.52939386  | 0.27168272  |
| 0.73415479  | 0.68666009  | 0.52697544  | 0.53938144  | 0.54422788  | 0.57553823  | 0.31072592  |
| 0.71025621  | 0.53305526  | 0.58781592  | 0.50572688  | 0.59684547  | 0.62348231  | 0.35248614  |
| 0.67582478  | 0.54086297  | 0.52210979  | 0.54363683  | 0.51404337  | 0.59289517  | 0.24058826  |
| 0.70971684  | 0.52551878  | 0.55541453  | 0.52688473  | 0.5733327   | 0.69481971  | 0.30527085  |
| 0.710844    | 0.55711052  | 0.51134191  | 0.53029058  | 0.56138995  | 0.60512291  | 0.32350918  |
| 0.69802715  | 0.48277307  | 0.350948    | 0.53610953  | 0.4991347   | 0.54967102  | 0.30268524  |
| 0.68687267  | 0.61965482  | 0.5265813   | 0.57371985  | 0.51663838  | 0.5813352   | 0.35936056  |
| 0.70228187  | 0.55557803  | 0.5351705   | 0.52364149  | 0.52374234  | 0.59531762  | 0.29281938  |
| 0.6826528   | 0.4140357   | 0.46443499  | 0.516515    | 0.52827868  | 0.59322388  | 0.31777685  |
| 0.66990615  | 0.51651669  | 0.35676445  | 0.54153199  | 0.41795863  | 0.45136722  | 0.27653645  |
| 0.72084526  | 0.5286453   | 0.48852374  | 0.53356491  | 0.5926842   | 0.65368701  | 0.33650511  |
| 0.69232994  | 0.48948391  | 0.51186725  | 0.55186614  | 0.52833247  | 0.58900907  | 0.37307296  |
| 0.66460775  | 0.47651733  | 0.44096839  | 0.52686562  | 0.52541402  | 0.59033704  | 0.29495947  |
| 0.68855028  | 0.46061393  | 0.4566434   | 0.51791239  | 0.53044605  | 0.64640281  | 0.29497432  |
| 0.71603782  | 0.49869882  | 0.47237067  | 0.53138572  | 0.55087938  | 0.62070253  | 0.33537567  |
| 0.7303172   | 0.56223721  | 0.51270638  | 0.53441539  | 0.58795997  | 0.61569455  | 0.28603125  |
| 0.72050909  | 0.55619168  | 0.5728494   | 0.53373465  | 0.58506612  | 0.6058168   | 0.30067946  |
| 0.71291157  | 0.61652546  | 0.57692152  | 0.53472958  | 0.65635943  | 0.6857494   | 0.37567859  |
| 0.66427647  | 0.39960536  | 0.41769074  | 0.5397068   | 0.55167959  | 0.64350117  | 0.33804126  |
| 0.7102668   | 0.47843602  | 0.38046479  | 0.53011439  | 0.54530039  | 0.6031569   | 0.51701138  |
| 0.71977143  | 0.57736914  | 0.53087684  | 0.50595943  | 0.57873362  | 0.71334758  | 0.40379892  |
| 0.67196726  | 0.51373488  | 0.4414497   | 0.51268966  | 0.50115366  | 0.49922275  | 0.26824343  |
| 0.72413213  | 0.59531326  | 0.53433498  | 0.51877735  | 0.59251483  | 0.57933792  | 0.21258252  |
| 0.69726572  | 0.6070367   | 0.4729765   | 0.55016665  | 0.53583618  | 0.55769576  | 0.30343001  |
| 0.67476134  | 0.50650923  | 0.47510365  | 0.52695397  | 0.51965493  | 0.51218084  | 0.24955265  |
| 0.73653028  | 0.61242594  | 0.36707131  | 0.52997361  | 0.54823482  | 0.56939384  | 0.25924562  |
| 0.66310979  | 0.47497268  | 0.40334748  | 0.52562461  | 0.50001765  | 0.51797098  | 0.27455047  |
| 0.69081038  | 0.63212221  | 0.44285971  | 0.50567781  | 0.54685842  | 0.61770688  | 0.26557518  |
| 0.68650966  | 0.52235569  | 0.31984586  | 0.47523716  | 0.41962523  | 0.49930432  | 0.17591979  |
| 0.71028651  | 0.46121172  | 0.55865482  | 0.52758181  | 0.5527151   | 0.60275504  | 0.33860207  |
| 0.72383785  | 0.38619048  | 0.46434532  | 0.56843566  | 0.51076614  | 0.55766221  | 0.35126769  |
| 0.72019226  | 0.54590493  | 0.56159445  | 0.57826066  | 0.55307846  | 0.56609228  | 0.29082953  |
| 0.67428614  | 0.40753497  | 0.39728385  | 0.50158436  | 0.52052224  | 0.50610633  | 0.25644651  |
| 0.7207794   | 0.59648903  | 0.51061648  | 0.54904953  | 0.58190978  | 0.67037913  | 0.52942991  |
| 0.725905893 | 0.566635139 | 0.438831304 | 0.539219335 | 0.564130276 | 0.621594972 | 0.337311836 |
| 0.77240844  | 0.77219303  | 0.52622104  | 0.53268333  | 0.6076919   | 0.5748794   | 0.3040599   |
| 0.74708067  | 0.70880382  | 0.48853719  | 0.48213191  | 0.53437909  | 0.63953995  | 0.20759657  |
| 0.7025239   | 0.61167525  | 0.4766369   | 0.5753406   | 0.53790689  | 0.56122909  | 0.2817953   |
| 0.67949642  | 0.48753251  | 0.46697645  | 0.58403192  | 0.53886125  | 0.59998689  | 0.32568118  |
| 0.6992474   | 0.47433774  | 0.43679219  | 0.54043124  | 0.53443637  | 0.54814205  | 0.28513221  |
| 0.63983947  | 0.28238526  | 0.27210905  | 0.53223347  | 0.46597498  | 0.51362621  | 0.20607276  |
| 0.67616748  | 0.45309374  | 0.43586668  | 0.54113166  | 0.51562003  | 0.57254264  | 0.28845784  |
| 0.70048476  | 0.58773497  | 0.47404824  | 0.53965718  | 0.54502243  | 0.54350732  | 0.28094993  |
| 0.65654465  | 0.46641101  | 0.4892494   | 0.53954138  | 0.49690604  | 0.54975329  | 0.30850054  |



|            |            |            |            |            |            |            |
|------------|------------|------------|------------|------------|------------|------------|
| 0.6984619  | 0.56013532 | 0.4681471  | 0.49963615 | 0.52039221 | 0.53681417 | 0.25359771 |
| 0.68153214 | 0.3820428  | 0.39225334 | 0.53562513 | 0.49009117 | 0.55291275 | 0.24540791 |
| 0.64848673 | 0.46938662 | 0.46391475 | 0.52267707 | 0.53368672 | 0.56384293 | 0.24525028 |
| 0.71813191 | 0.48297791 | 0.4414609  | 0.5426078  | 0.55954586 | 0.61834831 | 0.28251863 |
| 0.71215283 | 0.60384277 | 0.49220066 | 0.52583933 | 0.55420643 | 0.62439213 | 0.32503359 |
| 0.68848522 | 0.52681749 | 0.53580619 | 0.54883888 | 0.56818712 | 0.64791973 | 0.26826264 |
| 0.73289725 | 0.62446689 | 0.48974702 | 0.53086666 | 0.54548673 | 0.58456218 | 0.30304123 |
| 0.7586743  | 0.67423635 | 0.44423757 | 0.55678589 | 0.5380554  | 0.58166864 | 0.25918744 |
| 0.67662061 | 0.51130606 | 0.49691097 | 0.54936961 | 0.53761816 | 0.61267284 | 0.30709726 |
| 0.67553255 | 0.50997075 | 0.38864943 | 0.50598433 | 0.47375543 | 0.46749523 | 0.20491665 |
| 0.73326697 | 0.6557202  | 0.4684457  | 0.57664877 | 0.54350455 | 0.6106093  | 0.28046583 |
| 0.68162303 | 0.49545802 | 0.43498321 | 0.49396351 | 0.53667666 | 0.51724933 | 0.30760909 |
| 0.71610845 | 0.4072974  | 0.17760466 | 0.50518173 | 0.49572573 | 0.49151931 | 0.37642276 |
| 0.71716395 | 0.53640983 | 0.46570024 | 0.53095142 | 0.52755243 | 0.52126325 | 0.25089629 |
| 0.67476955 | 0.48861156 | 0.44944346 | 0.50035728 | 0.52122693 | 0.58699401 | 0.19991022 |
| 0.69043593 | 0.50164374 | 0.39633485 | 0.51811303 | 0.46507769 | 0.49780691 | 0.27922005 |
| 0.71820984 | 0.60249282 | 0.48674379 | 0.50702009 | 0.5003331  | 0.53287688 | 0.21135279 |
| 0.72492315 | 0.62162581 | 0.44880218 | 0.56148149 | 0.52375892 | 0.51722832 | 0.27897637 |
| 0.73028776 | 0.48076743 | 0.32945108 | 0.48705091 | 0.48186962 | 0.52118159 | 0.39242427 |
| 0.65112018 | 0.40780715 | 0.3311815  | 0.50971946 | 0.51045935 | 0.54623089 | 0.26876191 |
| 0.70804258 | 0.54434847 | 0.51995395 | 0.55083717 | 0.57990777 | 0.64779503 | 0.31800547 |
| 0.69232885 | 0.56640318 | 0.47463533 | 0.46653126 | 0.54792772 | 0.54842366 | 0.24136455 |
| 0.65744985 | 0.51328961 | 0.46523254 | 0.51174973 | 0.55926191 | 0.55761314 | 0.30393328 |
| 0.69131975 | 0.47483816 | 0.39068806 | 0.50313333 | 0.53478656 | 0.60826504 | 0.30306846 |
| 0.67938407 | 0.44191517 | 0.34225936 | 0.51197416 | 0.48812094 | 0.51290529 | 0.21052925 |
| 0.6665443  | 0.47994643 | 0.43178219 | 0.52042073 | 0.48547672 | 0.53619141 | 0.28961615 |
| 0.73781358 | 0.6703847  | 0.4829969  | 0.56480336 | 0.52789383 | 0.55637399 | 0.26674071 |
| 0.67439498 | 0.4020351  | 0.38807282 | 0.52114601 | 0.46344483 | 0.53439143 | 0.29837346 |
| 0.70271086 | 0.55614572 | 0.4730342  | 0.51117334 | 0.5144183  | 0.54668323 | 0.22700406 |
| 0.64953507 | 0.31637551 | 0.27678932 | 0.56304693 | 0.47726816 | 0.49372276 | 0.25132252 |
| 0.70316176 | 0.53705325 | 0.34836739 | 0.50823142 | 0.49800498 | 0.54220402 | 0.3017523  |
| 0.69337198 | 0.52618708 | 0.43791909 | 0.5397779  | 0.5201009  | 0.52007991 | 0.25588196 |
| 0.69330022 | 0.46867285 | 0.37019506 | 0.54827305 | 0.46927814 | 0.47545024 | 0.20897287 |
| 0.69230403 | 0.48689681 | 0.44097226 | 0.55168117 | 0.4982986  | 0.47315821 | 0.22327941 |
| 0.65904625 | 0.37354374 | 0.37495735 | 0.5065351  | 0.56371585 | 0.56667953 | 0.27071356 |
| 0.62539777 | 0.33819665 | 0.42322372 | 0.49481328 | 0.48845844 | 0.49748323 | 0.20926272 |
| 0.64833857 | 0.32461911 | 0.36261859 | 0.49669955 | 0.47480048 | 0.46314667 | 0.18626588 |
| 0.67323862 | 0.38389168 | 0.42719963 | 0.54471772 | 0.49675564 | 0.51781807 | 0.26410456 |
| 0.67236417 | 0.43506664 | 0.36194562 | 0.53295239 | 0.5046526  | 0.5233363  | 0.25787941 |
| 0.68721489 | 0.46261898 | 0.4990213  | 0.53646996 | 0.49762562 | 0.56124484 | 0.29739702 |
| 0.73817252 | 0.69991008 | 0.37955701 | 0.52372264 | 0.49221607 | 0.55393994 | 0.18657108 |
| 0.73155734 | 0.57355927 | 0.38308859 | 0.53669059 | 0.5467854  | 0.51800371 | 0.30275932 |
| 0.73824588 | 0.69006279 | 0.43963515 | 0.51562617 | 0.48482777 | 0.55558554 | 0.19886421 |
| 0.68170552 | 0.47844544 | 0.4465429  | 0.49474907 | 0.49823949 | 0.54569499 | 0.23797052 |

| Neutrophils | NKCD56brigh | NKCD56dim  | NK         | pDC        | T          | Thelper    |
|-------------|-------------|------------|------------|------------|------------|------------|
| 0.36355203  | 0.4842735   | 0.24121816 | 0.50789908 | 0.47358749 | 0.38694158 | 0.73653523 |
| 0.46186292  | 0.47776211  | 0.4135594  | 0.53917222 | 0.46158181 | 0.58766742 | 0.75097178 |
| 0.44375332  | 0.53527087  | 0.26320646 | 0.52375082 | 0.42115451 | 0.40538739 | 0.71516267 |
| 0.47074351  | 0.50959258  | 0.22326365 | 0.55224729 | 0.49152252 | 0.59111585 | 0.7648943  |
| 0.47789182  | 0.49664287  | 0.33705049 | 0.58646663 | 0.54934581 | 0.56891874 | 0.73606477 |
| 0.48652481  | 0.43863643  | 0.23416311 | 0.51763565 | 0.72296271 | 0.59262845 | 0.74280438 |
| 0.50222941  | 0.5135932   | 0.24064039 | 0.54508002 | 0.45187926 | 0.55922137 | 0.71800911 |
| 0.43057566  | 0.54311133  | 0.49164606 | 0.57874476 | 0.40811976 | 0.71999325 | 0.82456663 |
| 0.58125458  | 0.51104342  | 0.30680671 | 0.5353184  | 0.30996717 | 0.65423444 | 0.78225612 |
| 0.44263364  | 0.50410728  | 0.1928656  | 0.54638314 | 0.38744058 | 0.53278511 | 0.75952281 |
| 0.55126291  | 0.52086196  | 0.26969958 | 0.56485663 | 0.49083648 | 0.64528531 | 0.72520895 |
| 0.44247499  | 0.49818732  | 0.27461457 | 0.54076155 | 0.49078747 | 0.47167832 | 0.75623101 |
| 0.48320187  | 0.52368781  | 0.20135825 | 0.49899735 | 0.39915225 | 0.37449911 | 0.72549725 |
| 0.44551696  | 0.5093798   | 0.18944525 | 0.52333721 | 0.35416769 | 0.33943597 | 0.71658495 |
| 0.4989638   | 0.53129379  | 0.22921527 | 0.56124939 | 0.52896065 | 0.47496015 | 0.7238495  |
| 0.40244506  | 0.54697192  | 0.2039412  | 0.49893129 | 0.3683785  | 0.40538383 | 0.71984597 |
| 0.36677169  | 0.51247294  | 0.17376964 | 0.49813755 | 0.40165139 | 0.42634771 | 0.74779579 |
| 0.40788416  | 0.5144639   | 0.24023313 | 0.54889925 | 0.5052923  | 0.53215762 | 0.75580502 |
| 0.51617136  | 0.54729393  | 0.29967937 | 0.57694175 | 0.3000686  | 0.39078629 | 0.73404364 |
| 0.50722563  | 0.54358201  | 0.32036558 | 0.49100998 | 0.47476356 | 0.49940581 | 0.75313118 |
| 0.60031568  | 0.62232803  | 0.35185859 | 0.56749442 | 0.48275102 | 0.57574156 | 0.73953905 |
| 0.40385992  | 0.5853044   | 0.19082898 | 0.529034   | 0.41150096 | 0.36053925 | 0.73107108 |
| 0.54029761  | 0.52263569  | 0.30985938 | 0.53573672 | 0.51024158 | 0.49701474 | 0.72708982 |
| 0.3576203   | 0.49493361  | 0.10356401 | 0.49365965 | 0.40023031 | 0.39652868 | 0.73841076 |
| 0.3831796   | 0.43431184  | 0.2121373  | 0.5322746  | 0.34309306 | 0.48155987 | 0.73641801 |
| 0.4175316   | 0.59088635  | 0.26843811 | 0.50452121 | 0.39273289 | 0.41918266 | 0.75012057 |
| 0.39399646  | 0.5833536   | 0.20874968 | 0.51621904 | 0.2456755  | 0.35126251 | 0.72193284 |
| 0.49702257  | 0.48089929  | 0.34193669 | 0.55119887 | 0.46814818 | 0.5026567  | 0.74025469 |
| 0.34811867  | 0.45952439  | 0.16580945 | 0.52566757 | 0.38655853 | 0.37040647 | 0.72770945 |
| 0.3843723   | 0.52857773  | 0.20249285 | 0.51005831 | 0.41728329 | 0.35140773 | 0.70748244 |
| 0.46353026  | 0.53126855  | 0.14566245 | 0.55866796 | 0.45545646 | 0.46788646 | 0.73057646 |
| 0.43140556  | 0.54249651  | 0.23260766 | 0.52442799 | 0.51568089 | 0.50200188 | 0.75403127 |
| 0.48595137  | 0.53119339  | 0.24844081 | 0.55172117 | 0.50646837 | 0.54286031 | 0.73972206 |
| 0.38976661  | 0.5452834   | 0.28910433 | 0.50065857 | 0.40478757 | 0.52276689 | 0.78391371 |
| 0.42239646  | 0.44932596  | 0.26447583 | 0.52344749 | 0.31741559 | 0.43224756 | 0.71768478 |
| 0.45995838  | 0.47958883  | 0.25933888 | 0.53952077 | 0.48343706 | 0.60670559 | 0.76497998 |
| 0.44227899  | 0.59751007  | 0.37298535 | 0.5529381  | 0.48985642 | 0.63520395 | 0.79353427 |
| 0.40286474  | 0.51754381  | 0.31658826 | 0.48847866 | 0.35029647 | 0.53254588 | 0.75901298 |
| 0.44331614  | 0.53952254  | 0.25837032 | 0.51487444 | 0.34799334 | 0.53123708 | 0.78016597 |
| 0.43749893  | 0.48047238  | 0.12082001 | 0.55148563 | 0.4139511  | 0.33894607 | 0.69077214 |
| 0.50502175  | 0.56093013  | 0.38388175 | 0.52126556 | 0.51278973 | 0.50987193 | 0.68590878 |
| 0.43069132  | 0.5379957   | 0.21623558 | 0.52187476 | 0.48186897 | 0.39362748 | 0.71555705 |
| 0.42287147  | 0.51808577  | 0.24641829 | 0.52594598 | 0.45888666 | 0.51881422 | 0.74504418 |
| 0.48529414  | 0.50177432  | 0.3075941  | 0.58021478 | 0.39052776 | 0.62183485 | 0.74496293 |
| 0.44731532  | 0.5121086   | 0.21361339 | 0.54812714 | 0.57213211 | 0.52651706 | 0.75192104 |
| 0.45549129  | 0.50315504  | 0.27794451 | 0.57702921 | 0.36597736 | 0.46466817 | 0.70668295 |
| 0.4097986   | 0.55447715  | 0.22474478 | 0.50465228 | 0.3525996  | 0.41688702 | 0.7471948  |
| 0.45595437  | 0.58636352  | 0.18736689 | 0.53298171 | 0.39430098 | 0.41382978 | 0.75545217 |
| 0.36918189  | 0.45427656  | 0.25236413 | 0.55840625 | 0.49803989 | 0.43131031 | 0.73867287 |
| 0.45749581  | 0.55164914  | 0.16315762 | 0.56677498 | 0.31741559 | 0.49608218 | 0.73707812 |
| 0.37504173  | 0.43699469  | 0.30356566 | 0.5139302  | 0.4211055  | 0.29623389 | 0.71544911 |
| 0.39037322  | 0.50637919  | 0.37577682 | 0.52644061 | 0.47309747 | 0.49457055 | 0.7487994  |

|             |             |             |             |             |             |             |
|-------------|-------------|-------------|-------------|-------------|-------------|-------------|
| 0.3943584   | 0.5095189   | 0.19935917  | 0.52338822  | 0.40047533  | 0.3923964   | 0.72026024  |
| 0.50077988  | 0.54281943  | 0.32315402  | 0.55374034  | 0.657887    | 0.65387843  | 0.77806876  |
| 0.44054037  | 0.58207619  | 0.21848802  | 0.56731439  | 0.41649924  | 0.57090142  | 0.75581388  |
| 0.46026083  | 0.56210175  | 0.28209263  | 0.56026253  | 0.40718871  | 0.55404221  | 0.72517481  |
| 0.38352667  | 0.54464586  | 0.13278904  | 0.53524534  | 0.34108394  | 0.46434691  | 0.74545334  |
| 0.37985613  | 0.48871298  | 0.26975532  | 0.5210519   | 0.41032489  | 0.35790223  | 0.71919012  |
| 0.48922912  | 0.53070459  | 0.35109153  | 0.54366098  | 0.4314941   | 0.56992033  | 0.74773246  |
| 0.40585489  | 0.55173395  | 0.31776435  | 0.55997596  | 0.52655951  | 0.64629038  | 0.77240398  |
| 0.35816696  | 0.55451721  | 0.15764619  | 0.51238603  | 0.41272603  | 0.3289184   | 0.72364678  |
| 0.37093707  | 0.5076048   | 0.20771069  | 0.51961729  | 0.42566276  | 0.385609    | 0.72831206  |
| 0.52151874  | 0.46338734  | 0.30066748  | 0.55628814  | 0.40135738  | 0.45806034  | 0.6773621   |
| 0.45195669  | 0.49468947  | 0.23423533  | 0.55767454  | 0.47853678  | 0.49352272  | 0.69497131  |
| 0.40969069  | 0.46083432  | 0.27499238  | 0.52997345  | 0.50450826  | 0.51097722  | 0.7464583   |
| 0.50062575  | 0.55719822  | 0.26579273  | 0.55573549  | 0.66273828  | 0.47937259  | 0.73633543  |
| 0.45960009  | 0.49634772  | 0.298418    | 0.54241534  | 0.4262508   | 0.53638589  | 0.72551948  |
| 0.4551737   | 0.51196353  | 0.24418611  | 0.54002523  | 0.40968785  | 0.42340238  | 0.75182732  |
| 0.46820935  | 0.48261182  | 0.28130557  | 0.56626628  | 0.53199882  | 0.46725476  | 0.70441973  |
| 0.43391764  | 0.52126377  | 0.15378818  | 0.53819303  | 0.55978341  | 0.43467736  | 0.6998497   |
| 0.42075019  | 0.51668354  | 0.22881122  | 0.52590612  | 0.4526143   | 0.41349033  | 0.73814634  |
| 0.42520818  | 0.52248323  | 0.21565486  | 0.50858064  | 0.36695742  | 0.3185315   | 0.67727754  |
| 0.48300227  | 0.49279969  | 0.15248457  | 0.54071166  | 0.47334248  | 0.47150362  | 0.75236371  |
| 0.45800755  | 0.5151491   | 0.22456042  | 0.53881269  | 0.43693341  | 0.45684552  | 0.75245224  |
| 0.44926438  | 0.4979051   | 0.27410666  | 0.50933566  | 0.50416524  | 0.32757732  | 0.70320275  |
| 0.50169723  | 0.51131914  | 0.20584827  | 0.50453731  | 0.48333905  | 0.39662484  | 0.71741049  |
| 0.42827273  | 0.50855029  | 0.12859205  | 0.54373233  | 0.44193169  | 0.4453308   | 0.70141691  |
| 0.49711217  | 0.54460341  | 0.32512168  | 0.54873519  | 0.42928897  | 0.50842739  | 0.76054667  |
| 0.51991116  | 0.52972673  | 0.27677818  | 0.52193157  | 0.57257314  | 0.51580178  | 0.72222471  |
| 0.51610669  | 0.57783789  | 0.34306484  | 0.5645626   | 0.43933454  | 0.604239    | 0.72193216  |
| 0.537273    | 0.57108961  | 0.14742836  | 0.52653637  | 0.43521831  | 0.37141974  | 0.74114789  |
| 0.42959885  | 0.49373838  | 0.29001945  | 0.53044251  | 0.42022345  | 0.42197228  | 0.73623419  |
| 0.53793389  | 0.47432512  | 0.38219225  | 0.5336431   | 0.4192924   | 0.54578949  | 0.77388077  |
| 0.44917089  | 0.52304722  | 0.25485197  | 0.53971357  | 0.39523203  | 0.35477047  | 0.68233558  |
| 0.43036993  | 0.555818    | 0.30698405  | 0.53992133  | 0.42997501  | 0.53051523  | 0.69847136  |
| 0.48294828  | 0.54442404  | 0.31652641  | 0.55459592  | 0.50490028  | 0.48688908  | 0.70323285  |
| 0.41394461  | 0.58669647  | 0.23307749  | 0.52827688  | 0.49015044  | 0.42978021  | 0.6954441   |
| 0.38106437  | 0.61027512  | 0.34668725  | 0.53682356  | 0.40753173  | 0.51752221  | 0.72898824  |
| 0.34541819  | 0.4461261   | 0.13404738  | 0.53606043  | 0.35014946  | 0.38243894  | 0.71368314  |
| 0.4055456   | 0.62649538  | 0.42921925  | 0.54883496  | 0.37945313  | 0.58179451  | 0.76038323  |
| 0.3685793   | 0.49135476  | 0.0968919   | 0.5125596   | 0.34701328  | 0.44645065  | 0.72803938  |
| 0.48872716  | 0.45476578  | 0.13613948  | 0.53345087  | 0.37102465  | 0.41319801  | 0.76142811  |
| 0.41267068  | 0.66824398  | 0.18012735  | 0.52091949  | 0.33613466  | 0.38498849  | 0.70674404  |
| 0.49237761  | 0.4891201   | 0.21280259  | 0.55412754  | 0.39459499  | 0.53633165  | 0.73988251  |
| 0.37114014  | 0.45214649  | 0.09545381  | 0.54457002  | 0.36249816  | 0.36130764  | 0.72161743  |
| 0.46911921  | 0.54525071  | 0.18844067  | 0.54010093  | 0.5297447   | 0.5164561   | 0.73113245  |
| 0.479734885 | 0.584120913 | 0.384967098 | 0.559703566 | 0.353579654 | 0.394846588 | 0.685962812 |
| 0.45368497  | 0.64415128  | 0.37111693  | 0.59280394  | 0.40650267  | 0.65726148  | 0.71894946  |
| 0.43356041  | 0.56795557  | 0.34793519  | 0.52688662  | 0.44315676  | 0.72789546  | 0.79894469  |
| 0.38470642  | 0.57401779  | 0.38466792  | 0.52510899  | 0.37783604  | 0.49543224  | 0.7307172   |
| 0.4270588   | 0.53199589  | 0.18599182  | 0.552038    | 0.42066448  | 0.46553024  | 0.75003402  |
| 0.42881702  | 0.46244696  | 0.30554066  | 0.53644344  | 0.38895967  | 0.40207733  | 0.74990555  |
| 0.30268934  | 0.51985171  | 0.15420107  | 0.52292106  | 0.46888323  | 0.21728615  | 0.69874474  |
| 0.4734043   | 0.44236716  | 0.18450345  | 0.50634798  | 0.38807762  | 0.42743702  | 0.70113872  |
| 0.4029905   | 0.48063827  | 0.18359405  | 0.53829103  | 0.40841378  | 0.50748088  | 0.71040235  |
| 0.43433246  | 0.56694826  | 0.24362417  | 0.54251716  | 0.42992601  | 0.37563133  | 0.6818336   |

|            |            |            |            |            |            |            |
|------------|------------|------------|------------|------------|------------|------------|
| 0.42675063 | 0.5546232  | 0.14059038 | 0.5455604  | 0.41713628 | 0.45846045 | 0.67179293 |
| 0.37825846 | 0.62951088 | 0.11654893 | 0.52064477 | 0.33956486 | 0.35481405 | 0.69892981 |
| 0.39344475 | 0.54102699 | 0.20519168 | 0.51948087 | 0.29565835 | 0.42710787 | 0.70765145 |
| 0.41558449 | 0.57331194 | 0.24071568 | 0.55684309 | 0.46898123 | 0.45695864 | 0.73852231 |
| 0.45476129 | 0.5626234  | 0.30163271 | 0.55908539 | 0.46060175 | 0.55114571 | 0.73155853 |
| 0.5026161  | 0.50633934 | 0.35179579 | 0.50048005 | 0.39699613 | 0.46045421 | 0.72002138 |
| 0.46094933 | 0.58598464 | 0.30734683 | 0.56520168 | 0.40669868 | 0.55413992 | 0.70788429 |
| 0.4599119  | 0.50872357 | 0.40215982 | 0.52226991 | 0.47780173 | 0.62825052 | 0.77136465 |
| 0.38734976 | 0.51078932 | 0.15168587 | 0.53380816 | 0.49260058 | 0.41260528 | 0.75338013 |
| 0.41037248 | 0.52507137 | 0.21806055 | 0.50163336 | 0.35598079 | 0.43598784 | 0.70605302 |
| 0.43400465 | 0.53780803 | 0.32671308 | 0.56471214 | 0.39939727 | 0.58581502 | 0.75109972 |
| 0.41644477 | 0.56479009 | 0.16544914 | 0.53436891 | 0.26478659 | 0.41781875 | 0.70153833 |
| 0.40827552 | 0.66556576 | 0.22759218 | 0.54213114 | 0.21705787 | 0.42863453 | 0.72554397 |
| 0.38710005 | 0.58302961 | 0.15095193 | 0.56926928 | 0.40282746 | 0.50766193 | 0.69528673 |
| 0.39778024 | 0.63215601 | 0.29205397 | 0.54223856 | 0.39268388 | 0.495481   | 0.75838741 |
| 0.39728383 | 0.49761229 | 0.27449712 | 0.49277874 | 0.26160141 | 0.3322033  | 0.70626556 |
| 0.41266536 | 0.54544528 | 0.31251719 | 0.52671066 | 0.29639339 | 0.47530615 | 0.68371721 |
| 0.45971058 | 0.54933073 | 0.33627383 | 0.53645053 | 0.3842554  | 0.50849791 | 0.73519724 |
| 0.42239116 | 0.65845076 | 0.27152429 | 0.55428584 | 0.36293919 | 0.46593328 | 0.75411535 |
| 0.36266029 | 0.53532127 | 0.22314057 | 0.53180158 | 0.39395796 | 0.35624114 | 0.71513055 |
| 0.47228466 | 0.62994419 | 0.30390398 | 0.57408253 | 0.4350713  | 0.49652595 | 0.73634419 |
| 0.36894693 | 0.57849159 | 0.28094538 | 0.51587989 | 0.3140344  | 0.51739369 | 0.70016371 |
| 0.44741787 | 0.47857547 | 0.28946743 | 0.53230086 | 0.35181555 | 0.44480905 | 0.69788248 |
| 0.49900629 | 0.57252739 | 0.28680897 | 0.55635558 | 0.3859215  | 0.45073471 | 0.72292491 |
| 0.31999222 | 0.55951523 | 0.15963659 | 0.48877283 | 0.30663498 | 0.39800079 | 0.72942881 |
| 0.43588212 | 0.50154027 | 0.2970863  | 0.51491827 | 0.3351546  | 0.3343477  | 0.72916459 |
| 0.46996283 | 0.52722235 | 0.31683894 | 0.5477881  | 0.11209389 | 0.5093164  | 0.71518977 |
| 0.40567416 | 0.47452545 | 0.25910503 | 0.48732553 | 0.41424511 | 0.27027606 | 0.69353091 |
| 0.3968402  | 0.56717069 | 0.22046319 | 0.53245864 | 0.3157495  | 0.53935928 | 0.73457197 |
| 0.35728383 | 0.58189595 | 0.1308652  | 0.51047159 | 0.38043318 | 0.29193462 | 0.73429442 |
| 0.36856207 | 0.5753708  | 0.2642669  | 0.51745381 | 0.35627481 | 0.42314543 | 0.73248056 |
| 0.31575428 | 0.57058279 | 0.27008722 | 0.52037339 | 0.42541775 | 0.42274826 | 0.72109524 |
| 0.40279445 | 0.486617   | 0.20218032 | 0.51163315 | 0.34500417 | 0.35458715 | 0.75592834 |
| 0.43913006 | 0.45645867 | 0.19483094 | 0.51813798 | 0.45820062 | 0.31776445 | 0.71587074 |
| 0.36793644 | 0.59672706 | 0.24325449 | 0.51540714 | 0.36592836 | 0.52016146 | 0.76046095 |
| 0.37564322 | 0.39625156 | 0.0854081  | 0.49588069 | 0.34015289 | 0.26783031 | 0.68016481 |
| 0.41872705 | 0.48901802 | 0.17215239 | 0.46918091 | 0.31491645 | 0.28767423 | 0.68548794 |
| 0.347439   | 0.52968187 | 0.18075079 | 0.49779446 | 0.30217572 | 0.33540826 | 0.72342958 |
| 0.37815913 | 0.51120837 | 0.21759748 | 0.51714389 | 0.33544862 | 0.3694646  | 0.69796619 |
| 0.44093843 | 0.51904536 | 0.20942981 | 0.50584067 | 0.34603322 | 0.22328386 | 0.66612397 |
| 0.33673724 | 0.59577945 | 0.38547793 | 0.53264387 | 0.36622237 | 0.65008427 | 0.77214828 |
| 0.4310833  | 0.52234124 | 0.21367299 | 0.52996864 | 0.4069437  | 0.53659381 | 0.74193327 |
| 0.39040704 | 0.55803598 | 0.3685116  | 0.5132306  | 0.52259029 | 0.66681439 | 0.77183793 |
| 0.42077926 | 0.5219255  | 0.18138323 | 0.51928198 | 0.40258245 | 0.44352662 | 0.70400031 |

| Tcm        | Tem        | Tfh        | Tgd        | Th1        | Th17       | Th2        |
|------------|------------|------------|------------|------------|------------|------------|
| 0.64184198 | 0.50768436 | 0.36450497 | 0.21484563 | 0.3828059  | 0.55810582 | 0.50725738 |
| 0.66059322 | 0.55674627 | 0.45895753 | 0.39050691 | 0.39943955 | 0.45690429 | 0.51582376 |
| 0.63136378 | 0.52792907 | 0.46334351 | 0.13800666 | 0.35206508 | 0.54106207 | 0.48914737 |
| 0.6132953  | 0.57207338 | 0.45291589 | 0.25319033 | 0.33099436 | 0.52627427 | 0.56307747 |
| 0.61804917 | 0.57079441 | 0.4375807  | 0.33678793 | 0.39568355 | 0.46371497 | 0.53015658 |
| 0.66800187 | 0.62918553 | 0.45405363 | 0.33705979 | 0.39978804 | 0.49369376 | 0.53984417 |
| 0.62041535 | 0.60496191 | 0.47203312 | 0.21743361 | 0.36730635 | 0.49721224 | 0.5138631  |
| 0.65930984 | 0.65666255 | 0.58539123 | 0.40799833 | 0.51366041 | 0.26563183 | 0.59409485 |
| 0.61637558 | 0.5908947  | 0.51405863 | 0.41797516 | 0.479313   | 0.46219416 | 0.50861154 |
| 0.63040639 | 0.57970253 | 0.44250854 | 0.28869636 | 0.39448683 | 0.57204008 | 0.48689883 |
| 0.60417818 | 0.60526119 | 0.45860191 | 0.46606868 | 0.41942216 | 0.52419682 | 0.51999095 |
| 0.64150405 | 0.57262944 | 0.41052066 | 0.32718266 | 0.38965683 | 0.50341303 | 0.4739159  |
| 0.59725766 | 0.57211253 | 0.44011138 | 0.17496412 | 0.38922884 | 0.50999898 | 0.45948882 |
| 0.57101824 | 0.54748059 | 0.46726475 | 0.23061998 | 0.34447413 | 0.48357591 | 0.49173626 |
| 0.63630441 | 0.59828852 | 0.46385268 | 0.29766933 | 0.38398299 | 0.5101633  | 0.46291375 |
| 0.64086722 | 0.55250758 | 0.45200244 | 0.18504123 | 0.32600427 | 0.49421179 | 0.52074001 |
| 0.60583396 | 0.58865676 | 0.42396829 | 0.21922348 | 0.31748624 | 0.56476115 | 0.47669184 |
| 0.60325276 | 0.56471322 | 0.47673204 | 0.22543882 | 0.37709117 | 0.55979115 | 0.56909754 |
| 0.60362014 | 0.61452886 | 0.49924172 | 0.13074801 | 0.38939984 | 0.37628998 | 0.53507257 |
| 0.62050074 | 0.55089926 | 0.50015497 | 0.26208986 | 0.38487029 | 0.28824951 | 0.58130822 |
| 0.58746509 | 0.60909817 | 0.50920028 | 0.17661323 | 0.49243172 | 0.45128498 | 0.54912089 |
| 0.59806947 | 0.52951914 | 0.50248082 | 0.31722508 | 0.3638231  | 0.53067905 | 0.54805911 |
| 0.61811725 | 0.57959632 | 0.45427906 | 0.29960021 | 0.41728831 | 0.54426191 | 0.48034379 |
| 0.59790152 | 0.5876835  | 0.48212782 | 0.10022847 | 0.3405328  | 0.40805105 | 0.50213562 |
| 0.60103701 | 0.56395517 | 0.45284349 | 0.31937073 | 0.37516492 | 0.53162914 | 0.51375452 |
| 0.56661262 | 0.5445403  | 0.47911728 | 0.20979175 | 0.41012985 | 0.52064182 | 0.53846986 |
| 0.61230705 | 0.50132249 | 0.4891852  | 0.2136507  | 0.37102263 | 0.36213455 | 0.54486241 |
| 0.6163546  | 0.58246666 | 0.47580312 | 0.35215198 | 0.3731835  | 0.55516643 | 0.48413473 |
| 0.60004365 | 0.51879108 | 0.47186093 | 0.23321819 | 0.35678944 | 0.47168987 | 0.56520011 |
| 0.57488588 | 0.49668188 | 0.44778435 | 0.25736713 | 0.34656584 | 0.54237998 | 0.58606363 |
| 0.60155158 | 0.56186127 | 0.41329035 | 0.23551409 | 0.37708481 | 0.5367951  | 0.5118491  |
| 0.67033426 | 0.59399081 | 0.45496268 | 0.19569993 | 0.37959059 | 0.42105721 | 0.49731329 |
| 0.62429723 | 0.58493645 | 0.42879729 | 0.29141648 | 0.39732077 | 0.51452908 | 0.52572012 |
| 0.64486176 | 0.5558769  | 0.52955691 | 0.30005135 | 0.41828494 | 0.22288407 | 0.53544215 |
| 0.60429383 | 0.56806175 | 0.47812573 | 0.20920328 | 0.37840376 | 0.43019722 | 0.57118948 |
| 0.65416231 | 0.57585889 | 0.48524713 | 0.33160734 | 0.44187269 | 0.51023702 | 0.55468793 |
| 0.55978004 | 0.56897664 | 0.51847638 | 0.2183873  | 0.46220515 | 0.2433562  | 0.57723756 |
| 0.63068069 | 0.53428    | 0.46614543 | 0.31505226 | 0.3958383  | 0.4863694  | 0.54650688 |
| 0.64023417 | 0.58692016 | 0.46427024 | 0.22406821 | 0.38685821 | 0.35640127 | 0.57804429 |
| 0.60610276 | 0.55546937 | 0.42185585 | 0.24773069 | 0.32207878 | 0.52633678 | 0.52835568 |
| 0.57947411 | 0.57013368 | 0.47435544 | 0.27633277 | 0.39698932 | 0.53993103 | 0.45012818 |
| 0.61502949 | 0.53687786 | 0.43898768 | 0.23909467 | 0.37078596 | 0.5351732  | 0.54437594 |
| 0.6337132  | 0.53405294 | 0.46526687 | 0.261354   | 0.43213078 | 0.26012667 | 0.5735851  |
| 0.64123743 | 0.60280189 | 0.45210801 | 0.43292607 | 0.40039582 | 0.53135096 | 0.52346633 |
| 0.66449274 | 0.61176821 | 0.44957228 | 0.20622629 | 0.41985035 | 0.49630656 | 0.52821098 |
| 0.63145822 | 0.57026568 | 0.49987335 | 0.29695532 | 0.40658323 | 0.57630778 | 0.53617491 |
| 0.59841743 | 0.5393176  | 0.50228024 | 0.14542788 | 0.33716245 | 0.5608569  | 0.48499695 |
| 0.63013262 | 0.53850402 | 0.46247653 | 0.48826564 | 0.38664762 | 0.51205794 | 0.56967331 |
| 0.62158873 | 0.52880414 | 0.40818975 | 0.31741654 | 0.38969993 | 0.54644455 | 0.50227101 |
| 0.56577975 | 0.52355475 | 0.45201891 | 0.21521491 | 0.39412799 | 0.51968538 | 0.53127522 |
| 0.61171635 | 0.52872584 | 0.43519098 | 0.27132247 | 0.31909128 | 0.57871873 | 0.51146903 |
| 0.64014616 | 0.53237579 | 0.47733076 | 0.19289823 | 0.39245834 | 0.51710943 | 0.50677197 |

|             |             |             |             |            |             |            |
|-------------|-------------|-------------|-------------|------------|-------------|------------|
| 0.62020199  | 0.56189274  | 0.42240782  | 0.19537576  | 0.33817938 | 0.60298037  | 0.50823766 |
| 0.65774607  | 0.58225168  | 0.5046538   | 0.34218236  | 0.47194284 | 0.51232403  | 0.50523999 |
| 0.58229956  | 0.55979521  | 0.45528037  | 0.23628376  | 0.39397397 | 0.50259527  | 0.48902774 |
| 0.61817673  | 0.57793534  | 0.47314322  | 0.32189638  | 0.38351434 | 0.52455173  | 0.51925569 |
| 0.62031972  | 0.553259    | 0.46502903  | 0.22891444  | 0.38453618 | 0.41544579  | 0.56773103 |
| 0.63978079  | 0.50856112  | 0.38427181  | 0.16517532  | 0.3429142  | 0.53382568  | 0.53037609 |
| 0.63240133  | 0.61599192  | 0.44822735  | 0.30370549  | 0.35269365 | 0.49306473  | 0.50234191 |
| 0.63685395  | 0.6162553   | 0.44800953  | 0.30472476  | 0.44883284 | 0.55648376  | 0.49097955 |
| 0.60552836  | 0.56471023  | 0.39187749  | 0.1002472   | 0.28873329 | 0.49338158  | 0.43924647 |
| 0.57332246  | 0.55012927  | 0.39965115  | 0.21768801  | 0.36188501 | 0.51172468  | 0.45687987 |
| 0.59693512  | 0.57157713  | 0.4555133   | 0.3147597   | 0.33897938 | 0.53071498  | 0.49338316 |
| 0.59157121  | 0.57396581  | 0.41582773  | 0.22929239  | 0.34903917 | 0.5400667   | 0.47631346 |
| 0.58749979  | 0.56619769  | 0.46720748  | 0.42694459  | 0.39382489 | 0.48219023  | 0.53827175 |
| 0.60150145  | 0.57396014  | 0.51583351  | 0.17443461  | 0.38712587 | 0.50234598  | 0.55870185 |
| 0.62037148  | 0.56854206  | 0.43088283  | 0.21951698  | 0.40414409 | 0.50265458  | 0.54199199 |
| 0.57492696  | 0.52674198  | 0.42693305  | 0.31230601  | 0.37833183 | 0.53581268  | 0.54750833 |
| 0.61367567  | 0.56788285  | 0.44989039  | 0.22099409  | 0.403067   | 0.5579539   | 0.52687342 |
| 0.60322382  | 0.53166733  | 0.4194362   | 0.30194913  | 0.36498317 | 0.53629794  | 0.50735014 |
| 0.62942852  | 0.53842725  | 0.43749949  | 0.13285461  | 0.35332971 | 0.4885915   | 0.50831859 |
| 0.604045    | 0.55723134  | 0.42172675  | 0.23497669  | 0.2915516  | 0.5281439   | 0.53834791 |
| 0.5880485   | 0.56979174  | 0.45941503  | 0.55753637  | 0.42966574 | 0.52630348  | 0.58328735 |
| 0.58619577  | 0.53914678  | 0.42073501  | 0.21941983  | 0.38936295 | 0.54445451  | 0.55009005 |
| 0.56922184  | 0.5228436   | 0.40908318  | 0.34580467  | 0.35048623 | 0.53826173  | 0.49964677 |
| 0.58447824  | 0.51875432  | 0.44546455  | 0.37504685  | 0.38466693 | 0.41059325  | 0.50330505 |
| 0.58486281  | 0.5449514   | 0.46139082  | 0.22743506  | 0.39395332 | 0.52028639  | 0.53181157 |
| 0.57811907  | 0.58165344  | 0.42889123  | 0.30385557  | 0.37428029 | 0.54283098  | 0.49515682 |
| 0.61331599  | 0.55887455  | 0.45227727  | 0.32034934  | 0.39600087 | 0.5374953   | 0.47364365 |
| 0.61533309  | 0.59536955  | 0.44120888  | 0.26827724  | 0.42422941 | 0.54184414  | 0.48937776 |
| 0.55792603  | 0.54175345  | 0.43062912  | 0.24721212  | 0.41258517 | 0.55683057  | 0.54189853 |
| 0.6270708   | 0.52303576  | 0.4801029   | 0.21197494  | 0.35962081 | 0.56003415  | 0.55102101 |
| 0.61583826  | 0.58339381  | 0.49125044  | 0.30321493  | 0.43411633 | 0.47494074  | 0.55579952 |
| 0.54198821  | 0.52654323  | 0.423388    | 0.20625624  | 0.24822945 | 0.52453177  | 0.47069846 |
| 0.62404711  | 0.62545155  | 0.42784291  | 0.18285299  | 0.35006443 | 0.51450526  | 0.43959922 |
| 0.62210195  | 0.58111394  | 0.46454793  | 0.2446284   | 0.36298495 | 0.50040583  | 0.47498634 |
| 0.55999047  | 0.50845521  | 0.39974082  | 0.10327021  | 0.37919038 | 0.53792265  | 0.46183939 |
| 0.60712925  | 0.60391404  | 0.45443301  | 0.3208936   | 0.38803857 | 0.51730027  | 0.44851822 |
| 0.59904614  | 0.5525357   | 0.42825881  | 0.24008745  | 0.34627346 | 0.53660454  | 0.57314813 |
| 0.65208948  | 0.59247448  | 0.5532755   | 0.20194281  | 0.42330792 | 0.2663495   | 0.57239565 |
| 0.60486436  | 0.53826963  | 0.44659928  | 0.12090761  | 0.30962792 | 0.49144949  | 0.52685255 |
| 0.66587802  | 0.54535069  | 0.50636404  | 0.19289682  | 0.3694352  | 0.51637453  | 0.51351361 |
| 0.61598877  | 0.59448841  | 0.49889981  | 0.13419176  | 0.3816773  | 0.32083184  | 0.50668637 |
| 0.59568146  | 0.56486479  | 0.46201076  | 0.27882737  | 0.43440664 | 0.58717512  | 0.50402484 |
| 0.58296175  | 0.52493932  | 0.39483074  | 0.17285633  | 0.31658686 | 0.53147246  | 0.49855495 |
| 0.60248182  | 0.56463762  | 0.46995411  | 0.23742266  | 0.37069426 | 0.49872885  | 0.50966154 |
| 0.636362465 | 0.542972271 | 0.433793986 | 0.236072216 | 0.36113497 | 0.510710906 | 0.45604577 |
| 0.60847531  | 0.6263916   | 0.52763017  | 0.39144862  | 0.37047246 | 0.52719185  | 0.46423695 |
| 0.62034195  | 0.58418803  | 0.54670192  | 0.34045471  | 0.46060935 | 0.48706959  | 0.56135156 |
| 0.6004238   | 0.60030722  | 0.46640335  | 0.37866389  | 0.37943683 | 0.57089056  | 0.51404729 |
| 0.56333753  | 0.57124094  | 0.49667236  | 0.29435164  | 0.39641333 | 0.57912693  | 0.57104219 |
| 0.64522715  | 0.53116584  | 0.41002394  | 0.23390051  | 0.34387572 | 0.53987977  | 0.49848227 |
| 0.53773125  | 0.52601193  | 0.45598777  | 0.08614274  | 0.32976476 | 0.54918175  | 0.46301285 |
| 0.54363301  | 0.55931729  | 0.44720022  | 0.35302488  | 0.35432302 | 0.50111782  | 0.47889155 |
| 0.6176338   | 0.56101104  | 0.4326049   | 0.24689983  | 0.36233734 | 0.55217251  | 0.50824314 |
| 0.56074641  | 0.51767686  | 0.45474863  | 0.31102427  | 0.34642432 | 0.5939556   | 0.4849909  |

|            |            |            |            |            |            |            |
|------------|------------|------------|------------|------------|------------|------------|
| 0.58006034 | 0.58233872 | 0.44695781 | 0.24784197 | 0.29652767 | 0.49451243 | 0.45211596 |
| 0.57926154 | 0.56001854 | 0.47804866 | 0.20259483 | 0.33045026 | 0.47409465 | 0.44344384 |
| 0.59433884 | 0.52135075 | 0.48807022 | 0.21334249 | 0.37180299 | 0.3552336  | 0.5225704  |
| 0.57808223 | 0.61168029 | 0.45388618 | 0.16644177 | 0.33791074 | 0.52407496 | 0.48776682 |
| 0.59638624 | 0.6225354  | 0.50657469 | 0.2824928  | 0.42610519 | 0.54330867 | 0.49484613 |
| 0.60259651 | 0.5727517  | 0.45948835 | 0.38562287 | 0.41672985 | 0.46162569 | 0.4801044  |
| 0.61716224 | 0.61877713 | 0.47479514 | 0.2972476  | 0.39588689 | 0.51439574 | 0.45510992 |
| 0.65311276 | 0.5911055  | 0.49606973 | 0.20156751 | 0.42967922 | 0.49627218 | 0.51296198 |
| 0.63704285 | 0.57515095 | 0.45246558 | 0.1536529  | 0.36550168 | 0.54092293 | 0.51594466 |
| 0.62481309 | 0.54003937 | 0.4510644  | 0.14490219 | 0.34502079 | 0.52407863 | 0.54394744 |
| 0.66940305 | 0.60717581 | 0.51055154 | 0.22243807 | 0.41300085 | 0.51732092 | 0.48888415 |
| 0.61682798 | 0.55793316 | 0.43328987 | 0.16719325 | 0.28684883 | 0.56822639 | 0.49903111 |
| 0.63188119 | 0.58374697 | 0.4891452  | 0.1040254  | 0.30136452 | 0.43466477 | 0.4964728  |
| 0.61099293 | 0.63585791 | 0.49340473 | 0.19225857 | 0.32372402 | 0.50660519 | 0.47416426 |
| 0.639033   | 0.56638492 | 0.42954997 | 0.09606058 | 0.39923583 | 0.51320346 | 0.4981364  |
| 0.62369221 | 0.51324932 | 0.38955176 | 0.20828271 | 0.31963802 | 0.52158765 | 0.38749103 |
| 0.58946845 | 0.56170196 | 0.45793359 | 0.24173553 | 0.27664157 | 0.51524785 | 0.44828583 |
| 0.61876913 | 0.55433539 | 0.4862281  | 0.24577901 | 0.38360865 | 0.53355391 | 0.48000494 |
| 0.63292935 | 0.56523747 | 0.46050784 | 0.14682698 | 0.37023929 | 0.41074616 | 0.46606636 |
| 0.61758183 | 0.57660828 | 0.42894847 | 0.13000701 | 0.34214251 | 0.5483867  | 0.45767318 |
| 0.56377242 | 0.60642424 | 0.47742133 | 0.31062667 | 0.38661426 | 0.43091321 | 0.52178083 |
| 0.65149371 | 0.60650447 | 0.42881731 | 0.24351745 | 0.28659452 | 0.52672263 | 0.44005115 |
| 0.60827782 | 0.60986709 | 0.43362157 | 0.1917046  | 0.34795758 | 0.53856121 | 0.49275577 |
| 0.61572505 | 0.63603657 | 0.44877716 | 0.17050604 | 0.3817309  | 0.48527546 | 0.54115271 |
| 0.60104706 | 0.54824587 | 0.41517766 | 0.11292358 | 0.31457342 | 0.51069053 | 0.49214485 |
| 0.59016102 | 0.54117287 | 0.46045855 | 0.26951093 | 0.3378218  | 0.54206139 | 0.57002503 |
| 0.60002232 | 0.53900716 | 0.44128391 | 0.2913225  | 0.34518976 | 0.53665841 | 0.46303634 |
| 0.60910111 | 0.57895639 | 0.42458146 | 0.40645917 | 0.34011346 | 0.53540963 | 0.50881907 |
| 0.64289623 | 0.6057966  | 0.46075384 | 0.25098845 | 0.35803525 | 0.52656473 | 0.45903077 |
| 0.58880669 | 0.5382498  | 0.4049334  | 0.10806872 | 0.2784643  | 0.41697279 | 0.55168399 |
| 0.57011078 | 0.49400909 | 0.47818186 | 0.07268779 | 0.3392164  | 0.20263284 | 0.45494542 |
| 0.60840306 | 0.58792294 | 0.41085951 | 0.27404788 | 0.35262907 | 0.55391646 | 0.45028631 |
| 0.61921948 | 0.53896442 | 0.41863244 | 0.21164037 | 0.33733006 | 0.55283728 | 0.47056311 |
| 0.62042555 | 0.56361918 | 0.38751499 | 0.17160833 | 0.32683763 | 0.52669308 | 0.40945652 |
| 0.62111322 | 0.59141287 | 0.48089865 | 0.06752382 | 0.39582108 | 0.34445974 | 0.52249189 |
| 0.59607932 | 0.51093926 | 0.42743868 | 0.08895463 | 0.34376104 | 0.42811917 | 0.51200301 |
| 0.62010037 | 0.54647264 | 0.37696612 | 0.14138172 | 0.26083849 | 0.46753233 | 0.44325199 |
| 0.56576264 | 0.49713367 | 0.41131848 | 0.27109788 | 0.32201104 | 0.52725237 | 0.48946571 |
| 0.56329702 | 0.54775059 | 0.39918401 | 0.19969572 | 0.3354657  | 0.52929196 | 0.41689637 |
| 0.56556334 | 0.54054533 | 0.44364048 | 0.36654605 | 0.26274945 | 0.55510266 | 0.44892532 |
| 0.66146019 | 0.62747867 | 0.51188038 | 0.17886238 | 0.38210841 | 0.51065608 | 0.49874171 |
| 0.64125894 | 0.5653182  | 0.47908861 | 0.21596649 | 0.37592365 | 0.51934451 | 0.43416072 |
| 0.59387097 | 0.56787896 | 0.52253351 | 0.27146859 | 0.4377878  | 0.51061528 | 0.49502369 |
| 0.60330279 | 0.60173112 | 0.40139501 | 0.15071656 | 0.29603459 | 0.49387373 | 0.46844327 |

| Treg       | Activated_CD | Activated_der | Anti-inflamm | CD4+_regulat | CD8+_T_cells | Cytolytic_acti |
|------------|--------------|---------------|--------------|--------------|--------------|----------------|
| 0.24935071 | 0.41158509   | 0.50108929    | 0.20022933   | 0.30407839   | 0.28332982   | 0.39661212     |
| 0.36293919 | 0.50262816   | 0.539573      | 0.27097659   | 0.27529161   | 0.52396841   | 0.6250387      |
| 0.22127211 | 0.45826848   | 0.52134577    | 0.16070424   | 0.20940023   | 0.44944212   | 0.46439946     |
| 0.62118391 | 0.53184608   | 0.55493509    | 0.19151977   | 0.2919281    | 0.41804719   | 0.55336109     |
| 0.47853678 | 0.52355281   | 0.55567415    | 0.27554548   | 0.31051241   | 0.51847744   | 0.57100807     |
| 0.09582496 | 0.5376776    | 0.57626207    | 0.14385024   | 0.28208329   | 0.49693272   | 0.60970074     |
| 0.32672612 | 0.48468221   | 0.55230052    | 0.20984575   | 0.27166444   | 0.37294579   | 0.49481689     |
| 0.44854707 | 0.64040916   | 0.5934219     | 0.36486154   | 0.33576417   | 0.82555256   | 0.78263503     |
| 0.53895722 | 0.58211398   | 0.58431923    | 0.26315251   | 0.33837671   | 0.74717002   | 0.71734667     |
| 0.30050963 | 0.50322886   | 0.56460808    | 0.2084383    | 0.27789074   | 0.44667568   | 0.4960948      |
| 0.46050375 | 0.52603001   | 0.5758869     | 0.26461837   | 0.32835901   | 0.48347775   | 0.58901358     |
| 0.31197628 | 0.48413052   | 0.53027329    | 0.24160722   | 0.27831799   | 0.34955678   | 0.43956714     |
| 0.12890185 | 0.46840745   | 0.52220346    | 0.21718712   | 0.22441179   | 0.33446709   | 0.38556121     |
| 0.08298623 | 0.45258927   | 0.51578757    | 0.19018548   | 0.1816346    | 0.15150464   | 0.37187518     |
| 0.20823737 | 0.42927      | 0.52479956    | 0.24180346   | 0.26543079   | 0.39017319   | 0.52097182     |
| 0.01918459 | 0.49703089   | 0.51889996    | 0.1681503    | 0.22718629   | 0.33828143   | 0.40051098     |
| 0.13973146 | 0.5113444    | 0.52545863    | 0.1823395    | 0.25613508   | 0.33538924   | 0.36300965     |
| 0.28987602 | 0.56677635   | 0.55069909    | 0.19005681   | 0.30017682   | 0.35123341   | 0.41389645     |
| 0.28330965 | 0.53416037   | 0.54804521    | 0.48539537   | 0.22024904   | 0.24828822   | 0.49858357     |
| 0.35103151 | 0.53430387   | 0.53880536    | 0.32828743   | 0.26835116   | 0.30533562   | 0.44084089     |
| 0.46153281 | 0.55392666   | 0.57799703    | 0.3123323    | 0.32294426   | 0.46889105   | 0.58432527     |
| 0.12694174 | 0.46060204   | 0.52606122    | 0.2024147    | 0.22840833   | 0.18440854   | 0.3121891      |
| 0.24694958 | 0.42448347   | 0.55297991    | 0.26626665   | 0.27925825   | 0.37135299   | 0.49254717     |
| 0.21779291 | 0.51574849   | 0.51461164    | 0.22892806   | 0.2086914    | 0.24627626   | 0.25395896     |
| 0.28634782 | 0.49554429   | 0.520536      | 0.17316727   | 0.24782858   | 0.32822164   | 0.40520381     |
| 0.36935855 | 0.53422241   | 0.56031857    | 0.27890023   | 0.29225144   | 0.32050913   | 0.39510513     |
| 0.13350811 | 0.52920004   | 0.5069496     | 0.14617752   | 0.23313307   | 0.41628673   | 0.40345638     |
| 0.11371098 | 0.44354803   | 0.54540301    | 0.21743428   | 0.23190316   | 0.3902151    | 0.5404157      |
| 0.28968001 | 0.49635688   | 0.53506661    | 0.11742867   | 0.26083024   | 0.35223939   | 0.31841651     |
| 0.45530945 | 0.49835644   | 0.52154435    | 0.17997591   | 0.28913736   | 0.13260062   | 0.33259285     |
| 0.50651737 | 0.48689149   | 0.5489161     | 0.20162732   | 0.27380535   | 0.43129258   | 0.41688988     |
| 0.39719214 | 0.4656895    | 0.55219922    | 0.17330527   | 0.26546359   | 0.39591565   | 0.503069       |
| 0.84463664 | 0.48193713   | 0.56584826    | 0.25095316   | 0.35642751   | 0.47266347   | 0.50832617     |
| 0.37940413 | 0.53548743   | 0.54090816    | 0.27011576   | 0.27551279   | 0.48305859   | 0.48246821     |
| 0.17060322 | 0.53800041   | 0.55720962    | 0.15529882   | 0.29154239   | 0.45484926   | 0.43125083     |
| 0.18790121 | 0.55986441   | 0.55618713    | 0.21170463   | 0.29901793   | 0.76242737   | 0.74209585     |
| 0.34706228 | 0.61024628   | 0.5320649     | 0.2328596    | 0.30304311   | 0.69154776   | 0.66496444     |
| 0.40664968 | 0.56050949   | 0.54871279    | 0.21417117   | 0.28427984   | 0.39545458   | 0.50507731     |
| 0.37989415 | 0.57474912   | 0.56481877    | 0.30022579   | 0.31561231   | 0.50129196   | 0.51936622     |
| 0.48387808 | 0.44874982   | 0.51277464    | 0.29320668   | 0.26067695   | 0.28756332   | 0.29029256     |
| 0.33760474 | 0.41745052   | 0.56429193    | 0.26957269   | 0.29140587   | 0.44713675   | 0.57907057     |
| 0.25145783 | 0.47468697   | 0.50566245    | 0.15641241   | 0.22747373   | 0.30990444   | 0.413633       |
| 0.38905768 | 0.55781299   | 0.53442936    | 0.20703304   | 0.31250854   | 0.48025023   | 0.51358136     |
| 0.40272946 | 0.51032659   | 0.56090353    | 0.38805944   | 0.32921133   | 0.61027303   | 0.62899586     |
| 0.17658157 | 0.48674518   | 0.55420083    | 0.30554257   | 0.28445407   | 0.37835293   | 0.39587771     |
| 0.97072083 | 0.44709806   | 0.55223916    | 0.26974226   | 0.45199601   | 0.43925658   | 0.47801965     |
| 0.21793992 | 0.50217841   | 0.49347018    | 0.23723788   | 0.22438314   | 0.44210686   | 0.41910022     |
| 0.21789092 | 0.53681641   | 0.5455116     | 0.20248747   | 0.25671496   | 0.25776119   | 0.39428681     |
| 0.13615426 | 0.48697967   | 0.53529291    | 0.17763864   | 0.26720767   | 0.42202919   | 0.45802282     |
| 0.36063606 | 0.48056627   | 0.54590024    | 0.25524503   | 0.256011     | 0.46243602   | 0.50190878     |
| 0.29874553 | 0.46764912   | 0.4783889     | 0.13565276   | 0.24803475   | 0.14295382   | 0.27272447     |
| 0.27845837 | 0.52705301   | 0.52044668    | 0.24247751   | 0.24443912   | 0.48942979   | 0.48653848     |



|             |             |            |             |             |             |            |
|-------------|-------------|------------|-------------|-------------|-------------|------------|
| 0.19412457  | 0.45524422  | 0.5255113  | 0.217914    | 0.22383308  | 0.28865313  | 0.37303842 |
| 0.45134023  | 0.53243035  | 0.55749437 | 0.27363742  | 0.31100752  | 0.76485849  | 0.69633991 |
| 0.41351007  | 0.51532865  | 0.54870385 | 0.27095544  | 0.27360337  | 0.46537012  | 0.51390029 |
| 0.58198167  | 0.46832073  | 0.53813988 | 0.29957827  | 0.32218288  | 0.48553162  | 0.52997248 |
| 0.31413241  | 0.58112497  | 0.51187722 | 0.2395906   | 0.31535805  | 0.34867655  | 0.3243813  |
| 0.1806978   | 0.44961993  | 0.50792529 | 0.15697275  | 0.19756362  | 0.3143056   | 0.33596289 |
| 0.29629539  | 0.53010886  | 0.55634886 | 0.23959688  | 0.26632782  | 0.55599208  | 0.56657897 |
| 0.36984858  | 0.52828631  | 0.57525674 | 0.23663019  | 0.3119134   | 0.5629501   | 0.60428203 |
| 0.27110795  | 0.40107929  | 0.45389419 | 0.05823825  | 0.22091977  | 0.14756456  | 0.34458265 |
| 0.18491204  | 0.43656589  | 0.51228331 | 0.11286124  | 0.24429916  | 0.33375453  | 0.35572758 |
| 0.74775812  | 0.39802232  | 0.52255128 | 0.25801824  | 0.26154577  | 0.41565799  | 0.55643206 |
| 0.22489832  | 0.47380406  | 0.52994797 | 0.209448    | 0.24903772  | 0.36510754  | 0.47688405 |
| 0.37871809  | 0.51527692  | 0.52469401 | 0.20123682  | 0.26361478  | 0.54048323  | 0.46741893 |
| 0.21833194  | 0.51358552  | 0.54349194 | 0.25328345  | 0.22940055  | 0.53520184  | 0.50962202 |
| 0.29747146  | 0.56389432  | 0.54910413 | 0.30111926  | 0.28147654  | 0.43711888  | 0.49122167 |
| 0.26272848  | 0.52906989  | 0.54254473 | 0.20454768  | 0.30338209  | 0.37998765  | 0.3915565  |
| 0.67993826  | 0.40423415  | 0.53821319 | 0.22233259  | 0.35036718  | 0.40987361  | 0.47837612 |
| 0.85825942  | 0.40331578  | 0.52918103 | 0.30781736  | 0.33150972  | 0.4079874   | 0.40753833 |
| 0.13786936  | 0.51085362  | 0.50621598 | 0.22681061  | 0.19935048  | 0.35207173  | 0.35446733 |
| 0.58693096  | 0.50354615  | 0.49586033 | 0.32444481  | 0.41095899  | 0.19258212  | 0.38438396 |
| 0.38518646  | 0.57198184  | 0.56093055 | 0.22277456  | 0.31640772  | 0.38392773  | 0.40410369 |
| 0.2946783   | 0.4895998   | 0.56429418 | 0.24556419  | 0.27368695  | 0.33958082  | 0.44087821 |
| 0.26130739  | 0.45973941  | 0.54175614 | 0.16538251  | 0.22009347  | 0.27469517  | 0.37799366 |
| 0.36181212  | 0.47486528  | 0.56098558 | 0.20734551  | 0.25706705  | 0.22946803  | 0.31927516 |
| 0.11287793  | 0.49168618  | 0.53472096 | 0.29010548  | 0.25170433  | 0.37462243  | 0.40569463 |
| 0.15683344  | 0.50072337  | 0.55584733 | 0.26637718  | 0.22909778  | 0.48339392  | 0.54833862 |
| 0.37352379  | 0.48498155  | 0.54157569 | 0.27679152  | 0.28615303  | 0.44483138  | 0.53369896 |
| 0.2649826   | 0.49706943  | 0.55339482 | 0.30238538  | 0.26913559  | 0.54140538  | 0.53934124 |
| 0.27429313  | 0.51385038  | 0.57108435 | 0.25505096  | 0.27079637  | 0.27205447  | 0.29094601 |
| 0.54361249  | 0.48723501  | 0.53363728 | 0.23747086  | 0.31970177  | 0.35232322  | 0.41928239 |
| 0.36191013  | 0.57546328  | 0.59918086 | 0.27989175  | 0.30989121  | 0.64137455  | 0.58666038 |
| 0.99914245  | 0.42869343  | 0.503186   | 0.20329425  | 0.30950223  | 0.33618564  | 0.39617264 |
| 0.37587592  | 0.44523577  | 0.55939877 | 0.26205638  | 0.25297272  | 0.48930404  | 0.55885648 |
| 0.89540354  | 0.40666695  | 0.54205896 | 0.20767344  | 0.3368517   | 0.41498734  | 0.50823106 |
| 0.38822463  | 0.43306805  | 0.51149881 | 0.14953379  | 0.27518573  | 0.35374836  | 0.44091184 |
| 0.21098153  | 0.47103531  | 0.5291264  | 0.20644909  | 0.23081128  | 0.51696847  | 0.53211626 |
| 0.24400941  | 0.44872689  | 0.49676009 | 0.12452772  | 0.20766472  | 0.3198804   | 0.40203128 |
| 0.69669721  | 0.56668245  | 0.53172423 | 0.31915766  | 0.39585848  | 0.63936259  | 0.58312927 |
| 0.38489244  | 0.50848849  | 0.49446119 | 0.09168774  | 0.20829343  | 0.4491068   | 0.45005561 |
| 0.29605037  | 0.47374546  | 0.52631908 | 0.19641266  | 0.28033639  | 0.33425752  | 0.38379775 |
| 0.33990787  | 0.47406946  | 0.49295003 | 0.31570459  | 0.31292737  | 0.37705354  | 0.31807566 |
| 0.34858137  | 0.48541633  | 0.55524859 | 0.3023867   | 0.35124022  | 0.60964429  | 0.48046625 |
| 0.36122409  | 0.45027436  | 0.48380035 | 0.1001156   | 0.23923452  | 0.33333537  | 0.35424868 |
| 0.27581222  | 0.47410475  | 0.57798715 | 0.2404966   | 0.26443134  | 0.41033468  | 0.49978448 |
| 0.362694174 | 0.440567204 | 0.53916869 | 0.227089862 | 0.257873828 | 0.408029316 | 0.46205883 |
| 0.44962513  | 0.49172934  | 0.54029723 | 0.27638224  | 0.29173308  | 0.71946368  | 0.67938906 |
| 0.412285    | 0.62784666  | 0.56195283 | 0.24386826  | 0.30628368  | 0.81503169  | 0.76589508 |
| 0.5262655   | 0.43889124  | 0.5473172  | 0.26960467  | 0.35359801  | 0.45287922  | 0.56141179 |
| 0.32682413  | 0.48641824  | 0.55176471 | 0.39070669  | 0.32673934  | 0.2660186   | 0.4402327  |
| 0.54763071  | 0.46929899  | 0.50161485 | 0.24860385  | 0.30170502  | 0.42714292  | 0.38218466 |
| 0.16335081  | 0.40205608  | 0.50101811 | 0.2100295   | 0.17852246  | 0.19325278  | 0.1154478  |
| 0.21416671  | 0.45100166  | 0.53611162 | 0.21640759  | 0.21168494  | 0.24459963  | 0.35971166 |
| 0.75456951  | 0.47167719  | 0.53475918 | 0.22568891  | 0.39833557  | 0.46859764  | 0.49857633 |
| 0.21838095  | 0.37848273  | 0.52683453 | 0.24427728  | 0.30441562  | 0.41150833  | 0.35549552 |

|            |            |            |            |            |            |            |
|------------|------------|------------|------------|------------|------------|------------|
| 0.93436076 | 0.3680829  | 0.50723677 | 0.18280324 | 0.34261711 | 0.38472413 | 0.47129237 |
| 0.2842897  | 0.42187803 | 0.4977758  | 0.2350795  | 0.1951906  | 0.28957528 | 0.28370575 |
| 0.36249816 | 0.47476918 | 0.5210662  | 0.32245017 | 0.31742866 | 0.37017935 | 0.38497349 |
| 0.25689714 | 0.50385516 | 0.55518545 | 0.27155298 | 0.26729175 | 0.379317   | 0.38229445 |
| 0.40846278 | 0.53080781 | 0.55747357 | 0.27728064 | 0.30354592 | 0.5321839  | 0.48266625 |
| 0.46153281 | 0.49982172 | 0.56951543 | 0.27872613 | 0.27949471 | 0.37319729 | 0.4675594  |
| 0.30442985 | 0.4636004  | 0.54080094 | 0.19968164 | 0.22935639 | 0.55750104 | 0.54923817 |
| 0.47530259 | 0.50249446 | 0.56172086 | 0.22249243 | 0.34958548 | 0.73539168 | 0.71167271 |
| 0.31506346 | 0.40668253 | 0.53089376 | 0.23995913 | 0.27407005 | 0.37378411 | 0.40241151 |
| 0.29943157 | 0.53580862 | 0.48162996 | 0.12819119 | 0.25536398 | 0.47568141 | 0.43317702 |
| 0.52508943 | 0.47051987 | 0.53342013 | 0.21626625 | 0.30639193 | 0.62050049 | 0.5772963  |
| 0.53895722 | 0.39745828 | 0.52371414 | 0.13559218 | 0.24403312 | 0.29431176 | 0.40344075 |
| 0.30648797 | 0.49647153 | 0.49015112 | 0.17430588 | 0.22417257 | 0.40111321 | 0.29416546 |
| 0.25410398 | 0.45905174 | 0.49246244 | 0.25937045 | 0.20848179 | 0.39696355 | 0.44936245 |
| 0.43482629 | 0.48205915 | 0.51465389 | 0.09420455 | 0.25817403 | 0.40916104 | 0.38582089 |
| 0.43693341 | 0.36449851 | 0.48199589 | 0.13244121 | 0.26052155 | 0.24275533 | 0.3772158  |
| 0.25248689 | 0.43083662 | 0.53084238 | 0.16485298 | 0.21632884 | 0.52811807 | 0.53369138 |
| 0.73540942 | 0.43163184 | 0.54029106 | 0.20673239 | 0.34306243 | 0.57300989 | 0.54779027 |
| 0.37494487 | 0.46478449 | 0.50557493 | 0.22998552 | 0.24547731 | 0.51797445 | 0.44976115 |
| 0.2648356  | 0.44017919 | 0.49914239 | 0.25129324 | 0.24276486 | 0.24581519 | 0.30963939 |
| 0.40542461 | 0.49597831 | 0.55961342 | 0.2796644  | 0.25386746 | 0.43481351 | 0.45043147 |
| 0.11812123 | 0.45561028 | 0.52748694 | 0.15544608 | 0.24059263 | 0.34649693 | 0.48958816 |
| 0.30271475 | 0.45747466 | 0.54327533 | 0.15080535 | 0.22751624 | 0.37730504 | 0.43135249 |
| 0.3297643  | 0.53373475 | 0.51368719 | 0.22079548 | 0.21678363 | 0.39331687 | 0.3710693  |
| 0.25498603 | 0.53382349 | 0.51921093 | 0.198019   | 0.26882012 | 0.35928125 | 0.34115411 |
| 0.33221444 | 0.50110642 | 0.52612993 | 0.18998522 | 0.26200392 | 0.39956233 | 0.38373214 |
| 0.78715637 | 0.44751485 | 0.53482448 | 0.20527515 | 0.34094705 | 0.49160941 | 0.54806026 |
| 0.2754202  | 0.4433416  | 0.51048538 | 0.23646847 | 0.25433991 | 0.18579177 | 0.32133434 |
| 0.32966629 | 0.46873608 | 0.53140122 | 0.24814357 | 0.30987931 | 0.52585462 | 0.52728442 |
| 0.22558436 | 0.47990233 | 0.49727168 | 0.14482214 | 0.17257657 | 0.11164272 | 0.32768081 |
| 0.3701426  | 0.48859591 | 0.49003798 | 0.13916104 | 0.23316203 | 0.44416073 | 0.45008592 |
| 0.2911991  | 0.44862025 | 0.51848731 | 0.26131314 | 0.30490124 | 0.40203536 | 0.40994655 |
| 0.30986916 | 0.47210468 | 0.50894767 | 0.13596713 | 0.23614178 | 0.37592182 | 0.40317799 |
| 0.36926055 | 0.30838773 | 0.50352431 | 0.12191412 | 0.25480722 | 0.30650926 | 0.35008482 |
| 0.51107463 | 0.53318221 | 0.54132853 | 0.30094196 | 0.28997595 | 0.35974232 | 0.32800811 |
| 0.19971088 | 0.48850459 | 0.48914795 | 0.11497101 | 0.21031125 | 0.2458571  | 0.25430511 |
| 0.46241486 | 0.38047412 | 0.51577291 | 0.13289835 | 0.23205711 | 0.27905441 | 0.2478093  |
| 0.19799579 | 0.44630201 | 0.53201518 | 0.13669603 | 0.18116316 | 0.19585156 | 0.27077343 |
| 0.21196158 | 0.39823558 | 0.52382939 | 0.23344449 | 0.23782511 | 0.29439559 | 0.31217963 |
| 0.03814867 | 0.39573179 | 0.48485196 | 0.12575814 | 0.16004749 | 0.28986869 | 0.32089457 |
| 0.36779046 | 0.54564912 | 0.54245753 | 0.14854421 | 0.30225065 | 0.66660786 | 0.66900928 |
| 0.28649483 | 0.4098106  | 0.51238259 | 0.13093354 | 0.24947802 | 0.64414099 | 0.56043157 |
| 0.44398981 | 0.5631652  | 0.54647553 | 0.19359829 | 0.2941978  | 0.70952964 | 0.69116273 |
| 0.32706914 | 0.402563   | 0.51537424 | 0.17975233 | 0.20407759 | 0.34486221 | 0.43381934 |

| M1_macroph: | M2_macroph: | MHC_class_I | NK_cells   | Pro-inflammatory_cytokines |
|-------------|-------------|-------------|------------|----------------------------|
| 0.46284929  | 0.3083196   | 0.8198074   | 0.18417661 | 0.104677                   |
| 0.71166714  | 0.36877442  | 0.88514473  | 0.34695021 | 0.13137406                 |
| 0.52406245  | 0.3087791   | 0.86571821  | 0.07067669 | -0.0068941                 |
| 0.64353918  | 0.43895149  | 0.87094141  | 0.18055902 | 0.0279772                  |
| 0.62316191  | 0.45423466  | 0.86444868  | 0.26159688 | 0.16610325                 |
| 0.73135683  | 0.45630966  | 0.86417203  | 0.23146694 | 0.22117046                 |
| 0.64688945  | 0.52102711  | 0.87341078  | 0.17387568 | 0.12220846                 |
| 0.84546663  | 0.53011733  | 0.89382957  | 0.3107915  | 0.27459217                 |
| 0.70765376  | 0.4592498   | 0.89397901  | 0.26681006 | 0.30493252                 |
| 0.45541832  | 0.4001661   | 0.87315597  | 0.1570089  | 0.07838548                 |
| 0.61977192  | 0.50677903  | 0.86569144  | 0.25034483 | 0.18353423                 |
| 0.51360726  | 0.37335308  | 0.84380333  | 0.23898616 | 0.09238339                 |
| 0.52318244  | 0.42706069  | 0.86591416  | 0.13314452 | 0.07510875                 |
| 0.47179215  | 0.2719396   | 0.84935844  | 0.06896738 | 0.08578217                 |
| 0.56769833  | 0.33340447  | 0.87470558  | 0.40115325 | 0.03463757                 |
| 0.4346121   | 0.33223872  | 0.8675774   | 0.26745442 | -0.0273834                 |
| 0.5167331   | 0.28262977  | 0.85782767  | 0.17369197 | 0.00787051                 |
| 0.58953892  | 0.39255915  | 0.88102137  | 0.19202609 | 0.13308588                 |
| 0.612673    | 0.2518647   | 0.87259707  | 0.22009335 | 0.05426249                 |
| 0.5909219   | 0.35392751  | 0.82311903  | 0.23317574 | 0.11236092                 |
| 0.74616617  | 0.4853542   | 0.88691862  | 0.27714087 | 0.25762468                 |
| 0.45581806  | 0.29618432  | 0.86788837  | 0.14591265 | 0.07862819                 |
| 0.48613433  | 0.40543409  | 0.87412271  | 0.28162689 | 0.13644547                 |
| 0.41537728  | 0.24933485  | 0.78779097  | 0.07625683 | 0.04398501                 |
| 0.49403366  | 0.38287176  | 0.82588711  | 0.23530769 | 0.07204131                 |
| 0.66859953  | 0.34627508  | 0.88493032  | 0.14876847 | 0.18374613                 |
| 0.39995765  | 0.20926821  | 0.844574    | 0.09080815 | 0.030756                   |
| 0.52282156  | 0.46159343  | 0.86654255  | 0.33017199 | 0.14320343                 |
| 0.49253411  | 0.32485748  | 0.88359346  | 0.05001686 | 0.04846748                 |
| 0.48529836  | 0.35139257  | 0.85177392  | -0.0101648 | 0.02489377                 |
| 0.54781957  | 0.34504556  | 0.84962283  | 0.16629506 | 0.14555054                 |
| 0.496537    | 0.40920718  | 0.81920578  | 0.23332756 | 0.13208699                 |
| 0.61722854  | 0.51023753  | 0.86686404  | 0.19324671 | 0.06461005                 |
| 0.5573824   | 0.30451475  | 0.840807    | 0.19637762 | 0.12336604                 |
| 0.66407276  | 0.34232116  | 0.88254545  | 0.02772382 | 0.20897491                 |
| 0.7908003   | 0.33918402  | 0.88723319  | 0.42797428 | 0.18386082                 |
| 0.75352561  | 0.40803671  | 0.88382285  | 0.19159615 | 0.1830197                  |
| 0.61219732  | 0.39948494  | 0.87596552  | 0.25090894 | 0.15450034                 |
| 0.6352995   | 0.45678445  | 0.8379999   | 0.24863724 | 0.25674155                 |
| 0.54122272  | 0.36784804  | 0.84637703  | 0.15913364 | -0.0196913                 |
| 0.6219154   | 0.5335679   | 0.88062293  | 0.28288867 | 0.13162857                 |
| 0.4034431   | 0.33403998  | 0.84553649  | 0.15692379 | 0.05697811                 |
| 0.51046574  | 0.39389446  | 0.85270524  | 0.11232792 | 0.09799188                 |
| 0.61099306  | 0.46050653  | 0.85725255  | 0.31560735 | 0.22122576                 |
| 0.56693212  | 0.38763911  | 0.84399659  | 0.15933895 | 0.18872538                 |
| 0.4065546   | 0.39515     | 0.84507675  | 0.32451259 | 0.13786406                 |
| 0.45936589  | 0.31555214  | 0.87628812  | 0.15999049 | 0.04293685                 |
| 0.57559657  | 0.34073872  | 0.86897749  | 0.22450462 | 0.12580989                 |
| 0.5535626   | 0.3381677   | 0.84808755  | 0.23479682 | 0.09738313                 |
| 0.54561271  | 0.35057511  | 0.85777781  | 0.0287874  | 0.04945659                 |
| 0.35917483  | 0.32272137  | 0.82403547  | 0.04017915 | 0.02323699                 |
| 0.49953346  | 0.25962409  | 0.86498793  | 0.25720157 | 0.09210086                 |

|             |             |             |             |             |
|-------------|-------------|-------------|-------------|-------------|
| 0.45049733  | 0.3350123   | 0.83593715  | 0.08437207  | 0.04610693  |
| 0.69111314  | 0.34826748  | 0.88085441  | 0.25354761  | 0.17172652  |
| 0.64701469  | 0.45884281  | 0.87282825  | 0.00766171  | 0.07822846  |
| 0.57765049  | 0.46604618  | 0.86218451  | 0.13535397  | 0.12516514  |
| 0.55016419  | 0.36210714  | 0.84139342  | 0.08351181  | 0.04817351  |
| 0.37967059  | 0.36792011  | 0.83530425  | 0.20157542  | -0.0161851  |
| 0.66783338  | 0.49317826  | 0.89228337  | 0.21585134  | 0.10603051  |
| 0.73401037  | 0.46199411  | 0.8802303   | 0.21702525  | 0.12930096  |
| 0.33241289  | 0.16901159  | 0.81462595  | -0.0742672  | 0.01848179  |
| 0.51888103  | 0.26360319  | 0.83728566  | 0.06585095  | 0.07673126  |
| 0.44443612  | 0.37681261  | 0.84474473  | 0.35378999  | 0.07636911  |
| 0.48749269  | 0.43687994  | 0.84704359  | 0.13996313  | 0.06311702  |
| 0.52659173  | 0.33533349  | 0.87961322  | 0.11081788  | 0.14093466  |
| 0.62237837  | 0.39624768  | 0.89104904  | 0.13350285  | 0.22205978  |
| 0.5837518   | 0.40953716  | 0.87922594  | 0.2056218   | 0.13102573  |
| 0.5182571   | 0.35783949  | 0.88096783  | 0.20038573  | 0.06691466  |
| 0.52076856  | 0.38711368  | 0.85385667  | 0.28946726  | 0.18390857  |
| 0.48654049  | 0.40740216  | 0.83150265  | 0.21109596  | 0.08314599  |
| 0.46405626  | 0.35413024  | 0.80458092  | 0.05213851  | 0.01223767  |
| 0.28456451  | 0.33949841  | 0.86617466  | 0.278675    | 0.0890657   |
| 0.55993904  | 0.39831734  | 0.85845888  | 0.23940453  | 0.15304747  |
| 0.42547246  | 0.364083    | 0.85688102  | 0.17470265  | 0.13919654  |
| 0.34492747  | 0.34901809  | 0.8621279   | 0.11616073  | 0.09649592  |
| 0.43015329  | 0.35563379  | 0.83490917  | -0.0799143  | 0.07114759  |
| 0.42785089  | 0.368435    | 0.84173779  | 0.08055133  | 0.08446343  |
| 0.5266665   | 0.4161232   | 0.8586233   | 0.23284694  | 0.10175278  |
| 0.58364813  | 0.4029654   | 0.89055275  | 0.22914809  | 0.14567765  |
| 0.56034346  | 0.43964451  | 0.84858763  | 0.25012867  | 0.22681095  |
| 0.42888577  | 0.36204086  | 0.85220944  | -0.0283777  | 0.14226828  |
| 0.47515289  | 0.37479282  | 0.83014907  | 0.19910596  | 0.10744085  |
| 0.67136109  | 0.40949096  | 0.87977659  | 0.2373467   | 0.20603667  |
| 0.38052688  | 0.38574275  | 0.84027424  | 0.12123052  | -0.029747   |
| 0.50398063  | 0.48009588  | 0.84451204  | 0.22709886  | 0.03162101  |
| 0.52444096  | 0.35860445  | 0.86931856  | 0.31904329  | 0.06279397  |
| 0.51576825  | 0.31104223  | 0.86335947  | 0.07379679  | 0.0341805   |
| 0.50459313  | 0.36919252  | 0.85267621  | 0.19572072  | 0.10978391  |
| 0.45592049  | 0.31414678  | 0.84041417  | 0.11936476  | 0.02819175  |
| 0.71807193  | 0.39737663  | 0.89222506  | 0.10155199  | 0.27413148  |
| 0.55708191  | 0.22437357  | 0.88904811  | 0.10118299  | 0.10530671  |
| 0.4455696   | 0.42758817  | 0.84177255  | 0.02168175  | 0.02385018  |
| 0.38724365  | 0.4394686   | 0.80012926  | 0.21013872  | 0.11170747  |
| 0.58783864  | 0.41907978  | 0.88288638  | 0.07779752  | 0.17165616  |
| 0.39772333  | 0.29461493  | 0.8301975   | -0.0075082  | -0.0022023  |
| 0.52010582  | 0.42418143  | 0.8500798   | 0.23516772  | 0.04033973  |
| 0.529836686 | 0.396918085 | 0.839621619 | 0.242331366 | 0.052176238 |
| 0.6948595   | 0.52822287  | 0.87983594  | 0.15134123  | 0.08940692  |
| 0.72470739  | 0.39934652  | 0.89402057  | 0.269146    | 0.22658474  |
| 0.45421771  | 0.40024571  | 0.84262029  | 0.23747718  | 0.11005757  |
| 0.40705787  | 0.3901657   | 0.84058503  | 0.12378021  | 0.15284609  |
| 0.52089711  | 0.28069031  | 0.84821116  | 0.16004141  | 0.01585084  |
| 0.21083627  | 0.27776492  | 0.75790145  | 0.12867215  | 0.0303754   |
| 0.50011625  | 0.38250917  | 0.86199551  | 0.06630225  | 0.03586004  |
| 0.59895452  | 0.35937051  | 0.86929793  | 0.23269756  | 0.10870248  |
| 0.43986524  | 0.43328531  | 0.85325349  | 0.21855738  | 0.15798462  |

|            |            |            |            |            |
|------------|------------|------------|------------|------------|
| 0.52525127 | 0.38799917 | 0.85687804 | 0.11981169 | -0.0024306 |
| 0.37032938 | 0.30796636 | 0.83132264 | -0.0604138 | -0.0981267 |
| 0.49988643 | 0.43422735 | 0.84682489 | 0.19773322 | 0.0971043  |
| 0.50382356 | 0.40980104 | 0.86732604 | -0.0197312 | 0.01295605 |
| 0.63898511 | 0.4807823  | 0.89479464 | 0.23747518 | 0.10220518 |
| 0.66641118 | 0.48159716 | 0.85920641 | 0.2211743  | 0.1239596  |
| 0.5748777  | 0.38297694 | 0.86711453 | 0.19133835 | 0.04717157 |
| 0.66240062 | 0.41115219 | 0.89218614 | 0.22121379 | 0.1990615  |
| 0.54739837 | 0.32591698 | 0.85863074 | 0.11701406 | 0.12987353 |
| 0.48788585 | 0.30975811 | 0.86607635 | 0.12845089 | -0.0239147 |
| 0.62320039 | 0.3626195  | 0.88070341 | 0.19464051 | 0.12893766 |
| 0.40508728 | 0.31433037 | 0.84584562 | 0.15458842 | -0.0118533 |
| 0.35960193 | 0.31675738 | 0.83568379 | -0.0133758 | 0.03303535 |
| 0.46755154 | 0.40880348 | 0.86176805 | 0.00562894 | -0.008691  |
| 0.59350308 | 0.3822943  | 0.88109372 | 0.05961775 | 0.09235988 |
| 0.36452041 | 0.31042819 | 0.81600172 | 0.13206485 | 0.00062355 |
| 0.50064187 | 0.35824694 | 0.85888996 | 0.25930957 | -0.0114252 |
| 0.5953342  | 0.33989324 | 0.87787851 | 0.25807826 | 0.09342165 |
| 0.67904682 | 0.30648718 | 0.89828426 | 0.1521684  | 0.11246057 |
| 0.32720569 | 0.32528166 | 0.81808692 | -0.0733124 | -0.0181279 |
| 0.57885918 | 0.44689554 | 0.86619887 | 0.21709702 | 0.0523756  |
| 0.45144626 | 0.40871635 | 0.86999145 | 0.17809529 | 0.04452261 |
| 0.61330976 | 0.47242501 | 0.88321286 | 0.12243355 | 0.03211131 |
| 0.5962997  | 0.3669788  | 0.85183708 | 0.09519953 | 0.07048139 |
| 0.54130556 | 0.36143443 | 0.86171973 | -0.0449251 | 0.01703994 |
| 0.47686996 | 0.34508927 | 0.86717396 | 0.10785438 | 0.06250283 |
| 0.52743346 | 0.46319261 | 0.85580815 | 0.34368562 | 0.04516925 |
| 0.42869022 | 0.32623064 | 0.85180582 | 0.12534771 | -0.0406409 |
| 0.49248907 | 0.36720398 | 0.85181231 | 0.28208533 | 0.07887186 |
| 0.28201832 | 0.18767661 | 0.79890263 | 0.02108413 | 0.01978971 |
| 0.48112042 | 0.377246   | 0.84155412 | 0.07555605 | -0.0469075 |
| 0.37386586 | 0.38169928 | 0.85665307 | 0.15077507 | 0.04477677 |
| 0.53284786 | 0.21582718 | 0.88347317 | 0.19643497 | -0.0222341 |
| 0.39498577 | 0.30559561 | 0.82356172 | 0.12985699 | -0.032494  |
| 0.48864315 | 0.37633617 | 0.82463842 | 0.03612438 | 0.0819516  |
| 0.41215627 | 0.30948508 | 0.85434525 | 0.15824682 | -0.0392103 |
| 0.32517922 | 0.38029163 | 0.85511967 | 0.06591412 | 0.00199883 |
| 0.47555348 | 0.30755304 | 0.83222772 | -0.008306  | -0.013614  |
| 0.41221941 | 0.33952209 | 0.8431256  | 0.06189902 | 0.05676522 |
| 0.48956343 | 0.34054759 | 0.85030657 | 0.16560406 | -0.0328354 |
| 0.67655456 | 0.39181741 | 0.89230862 | 0.22093459 | 0.1273226  |
| 0.52192208 | 0.33503734 | 0.87544997 | 0.0972828  | 0.10128896 |
| 0.68109785 | 0.39871408 | 0.88604755 | 0.30629357 | 0.15170793 |
| 0.45810642 | 0.33669767 | 0.83606504 | 0.03446471 | 0.01951724 |
