# Supplementary material for: ARID1A deficiency promotes progression and potentiates therapeutic antitumour immunity in hepatitis B virus-related hepatocellular carcinoma
Source: Springer Nature journal article supplement (doi:10.1186/s12876-023-03059-w), 2024-01-02
Supplement: MOESM3 [file 26582710]

Primers for qPCR

|            |                        |
|------------|------------------------|
| GAPDH      | Sense primer(5'-3')    |
| galectin-9 | GTCTCCTCTGACTTCAACAGCG |
| EZH2       | TCTGGGACTATTCAAGGAGGTC |
|            | GACGGCTTCCCAATAACA     |

sgRNA for ARID1A knockout

sg1  
sg2

siRNA for ARID1A knockdown

Sense primer(5'-3')

GCAGGAGCUAUCUCAAGAUTT

Antisense primer(5'-3')  
ACCACCCTGTTGCTGTAGCCAA  
CCATCTTCAAACCGAGGGTTG  
TGAGGCTTCAGCACCACT

CAGCAGAACTCTCACGACCACGG  
CCTGTTGACCATAACCGCTGGGG

Antisense primer(5'-3')  
AUCUUGAGAUAGCUCCUGCTT
