# Supplementary material for: ARID1A deficiency promotes progression and potentiates therapeutic antitumour immunity in hepatitis B virus-related hepatocellular carcinoma
Source: Springer Nature journal article supplement (doi:10.1186/s12876-023-03059-w), 2024-01-02

# Unedited blot and gel images

## **The antibodies used in western blots as follow:**

ARID1A ( #12354; Cell Signaling Technology; 1:1,000 dilution for western blot), 270kDa

$\alpha$ -tubulin ( #ab7291; Abcam; 1:5,000 dilution for western blot), 55kDa

## **The Protein Ladder used in western blots as follow:**

PageRuler Plus Prestained Protein Ladder( #26619; Thermo Scientific™)

**Fig. 2e**

Band

Maker

Merge

ARID1A

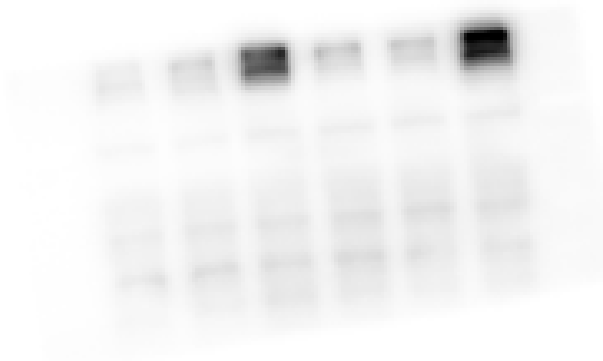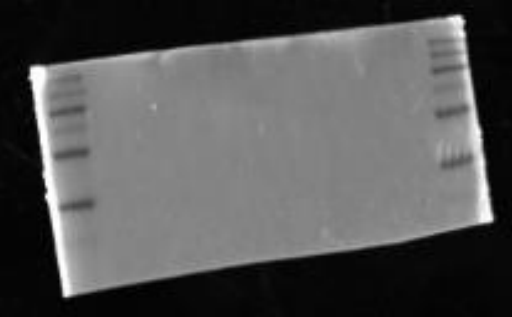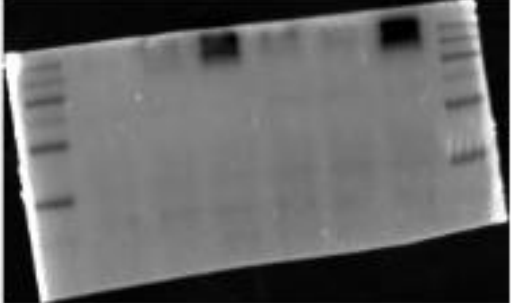

Tublin

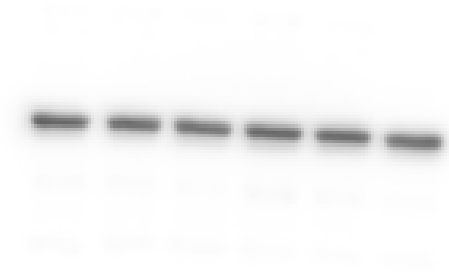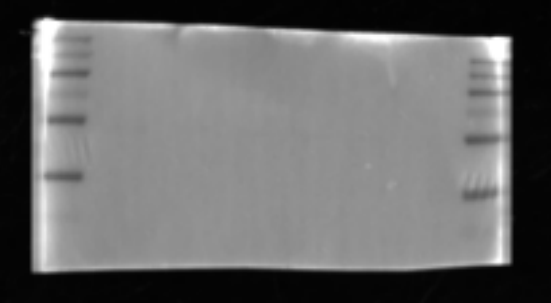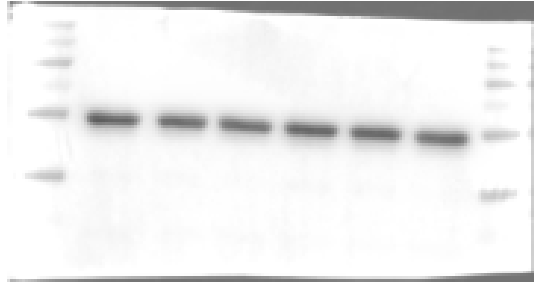

**Fig. 5b**

Band

Maker

Merge

ARID1A

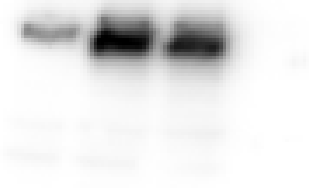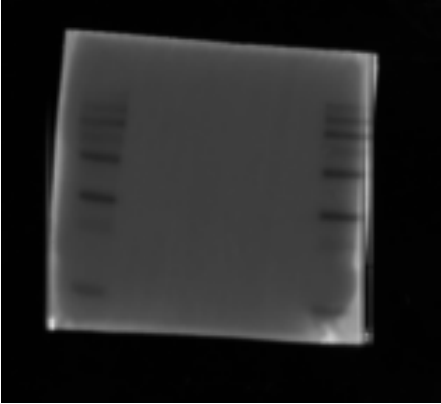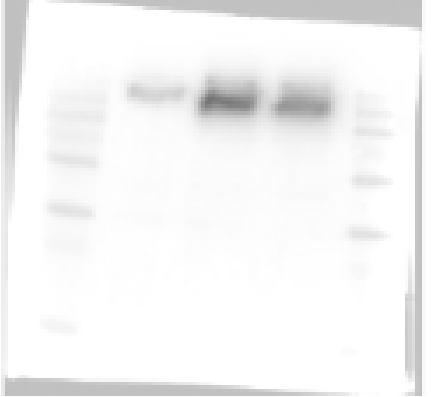

Tublin

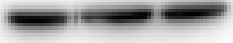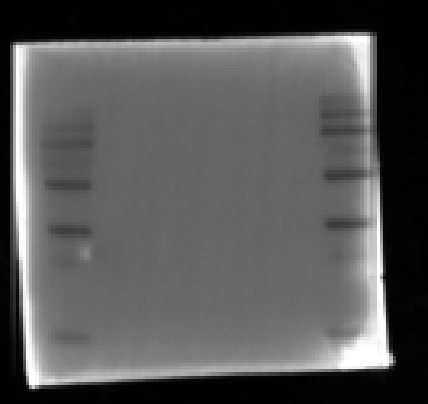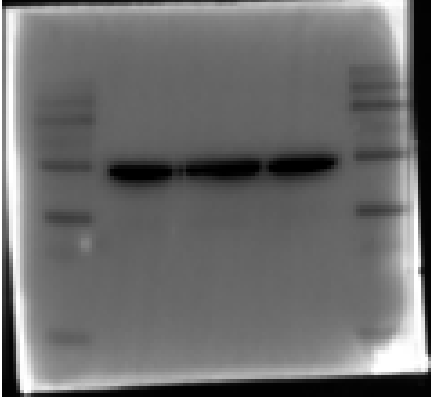

Supplement: MOESM4 [file 26582710]
